# Supplementary material for: Predicting phenotypes of beef eating quality traits
Source: Front Genet. 2023 Feb 1;14:1089490. doi: 10.3389/fgene.2023.1089490 (PMC9936823; doi:10.3389/fgene.2023.1089490)
Supplement: Supplementary file 1 [file Table1.XLSX]

## Sheet: Sheet1
Posterior probability of inclusion for in the BayesR prediction model for 709698 SNP for TENDER, JUICY, FLAVOR, OVERALL, and MQ4 traits
Chr:SNP position(bp)	TENDER	JUICY	FLAVOR	OVERALL	MQ4
1:719789	0.00633333	0.00413333	0.00513333	0.0038	0.00433333
1:724546	0.00573334	0.0042	0.00506667	0.00453333	0.00493333
1:769018	0.0068	0.0048	0.00493333	0.00506667	0.0044
1:776231	0.00606667	0.00413333	0.0042	0.00406667	0.0048
1:778681	0.00573333	0.00513333	0.0048	0.00286667	0.00353333
1:787144	0.00553333	0.0044	0.00473333	0.004	0.00306667
1:790905	0.00566667	0.005	0.00513333	0.00426667	0.00406667
1:792193	0.006	0.0054	0.00466667	0.00473333	0.00513333
1:793507	0.0058	0.00566666	0.0052	0.00413333	0.0038
1:797069	0.00606667	0.00446667	0.00506667	0.00533333	0.00466667
1:799951	0.00579999	0.0048	0.00526667	0.0048	0.00373333
1:801138	0.00633333	0.004	0.00526667	0.0054	0.00453333
1:805126	0.0058	0.00486667	0.00493333	0.00346667	0.00426667
1:805814	0.00666667	0.00386666	0.0058	0.00313333	0.00413333
1:809505	0.00606667	0.005	0.00533334	0.00466667	0.004
1:810128	0.007	0.00346667	0.00513333	0.00426667	0.0052
1:812618	0.00566667	0.0052	0.0054	0.00466667	0.00393333
1:815169	0.0052	0.00486667	0.00526667	0.00473333	0.0058
1:817590	0.00553333	0.00433333	0.00486667	0.0038	0.00486667
1:824172	0.00653333	0.00526667	0.00453333	0.0036	0.0038
1:828442	0.00646667	0.00433334	0.00546667	0.00353333	0.00393333
1:834575	0.00646667	0.00453333	0.006	0.00466667	0.0048
1:840327	0.00626667	0.00486667	0.00606667	0.00393333	0.0046
1:842891	0.00586667	0.0052	0.00526667	0.00353333	0.0036
1:848937	0.00679999	0.00493333	0.00493333	0.00526667	0.00446667
1:849544	0.00699999	0.00413333	0.00506667	0.0048	0.00386667
1:851174	0.0074	0.0048	0.00526667	0.00426667	0.00393334
1:851802	0.00726667	0.0042	0.00599999	0.0036	0.0048
1:853560	0.00673333	0.00426667	0.00573334	0.00513333	0.00573333
1:858145	0.00593333	0.00506667	0.00506667	0.00506667	0.005
1:860885	0.00566667	0.00433333	0.00573333	0.0052	0.00373333
1:865816	0.00606667	0.00446667	0.0048	0.00486667	0.00366667
1:876560	0.005	0.00446667	0.00566666	0.0056	0.0044
1:883546	0.00626667	0.00426667	0.0046	0.00386667	0.00386667
1:888832	0.00553333	0.0054	0.0044	0.00406667	0.00393333
1:895579	0.005	0.00433334	0.00546667	0.00426666	0.00446667
1:900147	0.00586667	0.00433333	0.00453333	0.0042	0.00453333
1:907810	0.00566667	0.00466667	0.005	0.00533333	0.0046
1:908945	0.00613334	0.0038	0.00513333	0.005	0.00486667
1:914796	0.00573333	0.0046	0.00553333	0.00513333	0.00366667
1:917956	0.0054	0.004	0.0048	0.0054	0.0048
1:918822	0.00566667	0.00453333	0.005	0.00446667	0.0046
1:923876	0.00606667	0.00373333	0.00593333	0.0046	0.00526667
1:928563	0.0052	0.00393333	0.00473333	0.00466667	0.0034
1:930560	0.00606667	0.00453333	0.00566667	0.00386667	0.00546667
1:933602	0.00546667	0.00413333	0.0052	0.0042	0.00573333
1:941443	0.0068	0.00333333	0.00593333	0.0046	0.00473333
1:944813	0.00673333	0.004	0.00413333	0.00413333	0.00473333
1:949357	0.00566667	0.00426667	0.004	0.00413334	0.0048
1:952483	0.00486667	0.00486667	0.0046	0.004	0.0046
1:962071	0.00633333	0.00466667	0.0044	0.0044	0.0044
1:967274	0.00586667	0.00406667	0.00426667	0.00493333	0.00486666
1:968297	0.00566667	0.0036	0.00533333	0.00393333	0.0054
1:970780	0.00606666	0.0048	0.00486667	0.00386667	0.0044
1:981085	0.00553333	0.00466667	0.00533333	0.00426667	0.005
1:982238	0.005	0.00446667	0.00466667	0.00546667	0.005
1:987646	0.0072	0.00346667	0.00586666	0.0034	0.0048
1:989416	0.006	0.00426667	0.00513333	0.0046	0.00506667
1:990831	0.00506667	0.0046	0.00433333	0.00526667	0.0042
1:993060	0.00646667	0.00513333	0.0044	0.004	0.0044
1:993937	0.0058	0.00453333	0.00606666	0.00386667	0.0042
1:995120	0.00573333	0.00373333	0.0046	0.00486667	0.00466667
1:996440	0.006	0.00466667	0.00573333	0.00346667	0.00386667
1:997375	0.00493333	0.0034	0.005	0.00466667	0.00413333
1:998235	0.00600001	0.0048	0.00613333	0.00506667	0.00426667
1:1001634	0.00693333	0.0042	0.0062	0.00393333	0.00466667
1:1004513	0.00546667	0.005	0.00526666	0.00446667	0.00446667
1:1009174	0.00620001	0.0038	0.00486667	0.0038	0.00493333
1:1012386	0.00626667	0.0046	0.00566667	0.00506667	0.004
1:1020188	0.0056	0.00493333	0.00433333	0.00473333	0.00453333
1:1021385	0.00533333	0.00433333	0.0042	0.00473333	0.0042
1:1023073	0.00673333	0.00466666	0.006	0.00426667	0.00493333
1:1024068	0.00573333	0.0044	0.00406667	0.0052	0.005
1:1025734	0.00526667	0.00506667	0.00473334	0.00466667	0.00426667
1:1027712	0.00506667	0.0054	0.00366667	0.00426667	0.00346667
1:1029073	0.0054	0.00426666	0.00466667	0.00446667	0.005
1:1029750	0.006	0.00453333	0.0046	0.00466667	0.0056
1:1030732	0.006	0.00393333	0.00493333	0.00546667	0.00453333
1:1032564	0.00566667	0.0052	0.00606667	0.00366667	0.00393333
1:1034296	0.00733334	0.00413333	0.0058	0.00446667	0.00333333
1:1035007	0.00473333	0.00366667	0.005	0.0042	0.0048
1:1035938	0.00553333	0.00453333	0.004	0.00466667	0.00366667
1:1038823	0.00586667	0.0052	0.00633334	0.0042	0.00426667
1:1041262	0.00553333	0.0036	0.0052	0.0038	0.00493333
1:1041727	0.0068	0.00466667	0.00473333	0.00513333	0.00373333
1:1042221	0.0064	0.00406667	0.00546667	0.00426667	0.00373333
1:1043014	0.0058	0.00493333	0.00526667	0.0046	0.004
1:1045142	0.00653333	0.0044	0.00526667	0.00453333	0.00473333
1:1046048	0.00526667	0.0042	0.0052	0.0046	0.0044
1:1047307	0.0068	0.00446667	0.00526667	0.00506667	0.0042
1:1052361	0.00586667	0.00393333	0.0054	0.00386667	0.0036
1:1055397	0.00606666	0.0046	0.0064	0.00426667	0.0038
1:1061569	0.00506667	0.0036	0.00553333	0.00346667	0.0042
1:1067987	0.00606667	0.00453333	0.00466667	0.00453333	0.00353333
1:1071551	0.00486667	0.0044	0.00446667	0.004	0.00406667
1:1072890	0.00573334	0.00466667	0.00406666	0.004	0.00493333
1:1077403	0.0058	0.0046	0.00586667	0.00506667	0.00386667
1:1080925	0.00533333	0.00366667	0.00613333	0.00326667	0.0038
1:1082216	0.00586667	0.00433333	0.005	0.00433334	0.0054
1:1085878	0.0062	0.00599999	0.0058	0.00446667	0.0048
1:1086817	0.00586667	0.00353333	0.0058	0.0048	0.00473333
1:1087810	0.0058	0.0048	0.00466667	0.00466667	0.0044
1:1088504	0.00573333	0.00373333	0.005	0.00346667	0.00433333
1:1091658	0.00486667	0.00466667	0.00546667	0.00366667	0.0046
1:1092486	0.00513333	0.00473333	0.00493333	0.0054	0.0038
1:1094000	0.00593333	0.00486667	0.00553333	0.0052	0.0036
1:1094557	0.006	0.004	0.00513334	0.00486667	0.00453333
1:1098033	0.00586667	0.00473333	0.0048	0.00446667	0.00413333
1:1099222	0.00546667	0.0048	0.00586667	0.0044	0.00506667
1:1100108	0.00593333	0.0048	0.005	0.00466667	0.00446667
1:1101545	0.00633333	0.00453333	0.004	0.004	0.004
1:1102489	0.00706667	0.00353333	0.00566667	0.0052	0.00426667
1:1103174	0.00526667	0.00466667	0.00586667	0.00426667	0.00433333
1:1104577	0.00493333	0.0042	0.00606667	0.00393333	0.00453333
1:1105364	0.00613333	0.0046	0.00533333	0.00466667	0.0046
1:1105927	0.00620001	0.0034	0.00533333	0.00553333	0.00453333
1:1110393	0.006	0.00426667	0.00506667	0.00493333	0.0052
1:1112539	0.00653333	0.00446667	0.006	0.00533333	0.00393333
1:1113772	0.00566667	0.00386667	0.00546667	0.00386667	0.00406666
1:1117674	0.00646667	0.00413333	0.00533333	0.0044	0.00453333
1:1120201	0.00533333	0.00486667	0.005	0.00386667	0.0042
1:1126372	0.00646667	0.00453333	0.00606666	0.00493333	0.00546667
1:1133120	0.00693334	0.00453333	0.00553334	0.0054	0.00353333
1:1139082	0.00506667	0.0046	0.00506667	0.00486667	0.00426667
1:1145725	0.0064	0.00413333	0.00546667	0.00506667	0.00553333
1:1149230	0.00513333	0.00473333	0.0052	0.004	0.00466666
1:1150763	0.0056	0.0058	0.005	0.00393334	0.00453333
1:1152173	0.00686667	0.0046	0.00593333	0.00566667	0.0046
1:1153435	0.00760001	0.00493333	0.0058	0.00326667	0.0046
1:1155003	0.00766667	0.00413333	0.006	0.00446667	0.0042
1:1156411	0.00799999	0.00406667	0.00593333	0.00446667	0.00406667
1:1161575	0.00679999	0.00513333	0.00493333	0.00406667	0.00506667
1:1162865	0.00626666	0.004	0.0056	0.00446667	0.00486667
1:1166331	0.00606667	0.0046	0.00573333	0.0042	0.00493334
1:1167048	0.00653333	0.0052	0.0056	0.00446667	0.00526667
1:1171794	0.00513333	0.00393333	0.00553333	0.00506667	0.00526667
1:1188534	0.00526667	0.00473333	0.00466667	0.00453334	0.004
1:1196001	0.00586667	0.00506667	0.00533333	0.00506667	0.00493333
1:1197303	0.00613333	0.00413333	0.00453333	0.00526667	0.005
1:1198396	0.00613333	0.00466667	0.0038	0.0038	0.004
1:1199009	0.00586667	0.00386667	0.00513333	0.00393333	0.0032
1:1201923	0.0064	0.00426667	0.00546666	0.00466667	0.00433333
1:1205650	0.0066	0.00353333	0.00493333	0.00433333	0.0044
1:1208548	0.00573333	0.00446667	0.00446667	0.00326667	0.00366667
1:1217609	0.0064	0.0036	0.00553333	0.00386667	0.00453333
1:1220841	0.0052	0.0046	0.0042	0.00486667	0.00453333
1:1225308	0.00553333	0.00433333	0.0044	0.00446667	0.0054
1:1228432	0.00573333	0.0042	0.00573333	0.0044	0.00393333
1:1232515	0.00626667	0.0042	0.00506667	0.00546667	0.00506667
1:1235550	0.006	0.00413333	0.00473333	0.00413333	0.00446667
1:1238461	0.00513333	0.00486667	0.0044	0.00486667	0.00506667
1:1241683	0.006	0.00446667	0.00653333	0.00373333	0.0046
1:1243514	0.00626667	0.00513333	0.00506667	0.00366667	0.0036
1:1245818	0.0058	0.00433333	0.005	0.00453333	0.00466666
1:1252625	0.00586666	0.0042	0.00513333	0.00546667	0.005
1:1255775	0.00426667	0.00473333	0.00553333	0.00466667	0.0034
1:1257445	0.00493333	0.00466667	0.00433333	0.00446666	0.0048
1:1259406	0.00646667	0.00346667	0.00433333	0.00333333	0.0048
1:1265712	0.005	0.0046	0.00526667	0.005	0.004
1:1266357	0.00633333	0.00533333	0.00506667	0.00386667	0.0042
1:1272180	0.00506667	0.0052	0.00613333	0.0046	0.00386667
1:1272986	0.0062	0.00413333	0.0042	0.004	0.00386667
1:1274010	0.00553333	0.0044	0.005	0.00366667	0.0054
1:1276295	0.0052	0.0032	0.0044	0.005	0.00506667
1:1276912	0.00553333	0.004	0.00586667	0.00526666	0.00433333
1:1277514	0.00546667	0.0054	0.00426667	0.00426666	0.0052
1:1312720	0.00646666	0.0042	0.0052	0.0048	0.00446667
1:1317200	0.00613334	0.00446667	0.00566667	0.00453333	0.00473333
1:1368477	0.0054	0.0038	0.00586667	0.00386667	0.00433333
1:1371361	0.00653333	0.0042	0.00626667	0.00406667	0.00413333
1:1375784	0.0056	0.00366667	0.0054	0.00413333	0.0044
1:1378362	0.00593333	0.00426667	0.00506666	0.00493333	0.00393334
1:1382499	0.00553333	0.0046	0.00513333	0.00473333	0.00353333
1:1385687	0.006	0.0046	0.00526667	0.00453333	0.00426667
1:1389678	0.00573333	0.0044	0.0052	0.00473333	0.00373333
1:1392289	0.00493334	0.0044	0.00446667	0.00446667	0.00513333
1:1396766	0.00486667	0.00466667	0.0052	0.00486667	0.0044
1:1399745	0.00606667	0.00413333	0.00633333	0.00433333	0.0056
1:1400585	0.00533333	0.00386667	0.00486667	0.0046	0.00486667
1:1403560	0.00666667	0.0046	0.00533333	0.00406667	0.0044
1:1406817	0.006	0.00413333	0.00486667	0.0036	0.00393333
1:1408026	0.006	0.00486667	0.00486667	0.00386667	0.00446666
1:1412376	0.00693334	0.00393333	0.00513333	0.00366667	0.005
1:1416198	0.00626666	0.00393334	0.005	0.00346667	0.00486667
1:1422040	0.00586667	0.00453333	0.00533333	0.00366667	0.00486667
1:1426466	0.00546667	0.005	0.006	0.00506667	0.00433333
1:1430780	0.0054	0.0042	0.00466667	0.005	0.00466667
1:1434878	0.00593333	0.0048	0.00533333	0.00466667	0.0046
1:1440329	0.00613333	0.00546667	0.005	0.00453333	0.0038
1:1447896	0.0062	0.00393333	0.00553333	0.00446667	0.0044
1:1452150	0.0066	0.00473333	0.00493333	0.00406667	0.00433333
1:1459085	0.00593333	0.00366667	0.00446667	0.00406667	0.004
1:1464637	0.0058	0.0042	0.00466667	0.00533333	0.00353333
1:1469010	0.00666667	0.00426667	0.00573334	0.00546667	0.00413333
1:1472771	0.0064	0.00493333	0.00473333	0.0052	0.00506667
1:1480243	0.00646666	0.00433333	0.00546667	0.00506667	0.0052
1:1487082	0.00626667	0.005	0.00473333	0.00486667	0.00406666
1:1493402	0.00666667	0.00446666	0.005	0.0036	0.0042
1:1498423	0.00646667	0.00513333	0.00486667	0.004	0.00366667
1:1502102	0.00566667	0.00513333	0.00626667	0.00473333	0.0044
1:1505863	0.00666666	0.00426667	0.00413333	0.00513333	0.00413333
1:1510920	0.00686667	0.00446667	0.0046	0.005	0.0044
1:1519087	0.00573333	0.00453333	0.00413333	0.00326667	0.0044
1:1523007	0.00513333	0.0046	0.005	0.00433333	0.00446667
1:1530748	0.0046	0.0036	0.00473333	0.00513333	0.0044
1:1532563	0.00613334	0.00473333	0.0046	0.004	0.0046
1:1535967	0.0062	0.00466667	0.00486667	0.00473333	0.0044
1:1539499	0.0056	0.00453333	0.0044	0.00546667	0.0058
1:1540641	0.006	0.00413333	0.00433333	0.00433333	0.00533333
1:1543729	0.00680001	0.00473333	0.00646667	0.00473333	0.00393333
1:1545418	0.00566667	0.00493333	0.00493333	0.0038	0.00493333
1:1550444	0.0062	0.00486667	0.00486667	0.00386667	0.00553333
1:1552410	0.0064	0.00426667	0.00546667	0.00513333	0.00473333
1:1556392	0.00606667	0.00426667	0.00486667	0.00466667	0.0054
1:1558454	0.00653333	0.00413333	0.005	0.00506667	0.00486667
1:1559099	0.00553333	0.0056	0.005	0.00486667	0.0038
1:1561579	0.00653333	0.00473333	0.00406666	0.00386667	0.00453333
1:1562658	0.00740001	0.0046	0.00533333	0.00453334	0.0052
1:1566539	0.00586667	0.00446667	0.0054	0.0046	0.00553334
1:1567663	0.007	0.00473333	0.0056	0.00573333	0.00446667
1:1568595	0.00553333	0.00353334	0.00653333	0.00466666	0.00386667
1:1569217	0.00526667	0.00493333	0.00726667	0.0044	0.0044
1:1571091	0.00686667	0.00406667	0.0052	0.00353333	0.00373333
1:1571852	0.00706667	0.00433333	0.00673333	0.0034	0.00586666
1:1581113	0.006	0.0052	0.0046	0.00446667	0.00486667
1:1581845	0.00566667	0.00446667	0.0044	0.00453333	0.0052
1:1583107	0.00653333	0.00446667	0.00613333	0.0056	0.00526666
1:1584358	0.0062	0.0036	0.00546667	0.00433333	0.0046
1:1585123	0.006	0.00406666	0.00446667	0.00473333	0.0042
1:1585904	0.00566667	0.00506667	0.0052	0.00453334	0.00426667
1:1587057	0.0064	0.0046	0.0044	0.00386667	0.0042
1:1588344	0.00666667	0.00373333	0.0054	0.00373333	0.00506667
1:1592085	0.00586667	0.0048	0.00513333	0.0052	0.00433333
1:1599676	0.00533333	0.00453333	0.005	0.00446667	0.00433333
1:1601750	0.00753334	0.00493333	0.005	0.00533333	0.00513333
1:1603766	0.00553333	0.0034	0.00453334	0.00426667	0.0042
1:1604940	0.00673334	0.00406667	0.00473333	0.0048	0.004
1:1606992	0.0064	0.00466667	0.00546667	0.00386667	0.00526667
1:1607607	0.0064	0.00506667	0.0044	0.00446667	0.00486667
1:1611266	0.00820001	0.00426667	0.00586666	0.00573333	0.00566667
1:1616465	0.00566667	0.00486667	0.00546667	0.00566667	0.00526667
1:1620487	0.0058	0.00433333	0.005	0.00513333	0.00533333
1:1621844	0.00586667	0.00433333	0.00566667	0.00506667	0.00506666
1:1623206	0.00666666	0.0044	0.0046	0.00353333	0.0044
1:1623919	0.00486667	0.00393333	0.0054	0.00413333	0.0052
1:1625016	0.00606666	0.0046	0.0046	0.00406667	0.00393333
1:1626677	0.00426667	0.00466667	0.00586667	0.00493333	0.0044
1:1627573	0.00513333	0.00433333	0.0056	0.00466667	0.00453333
1:1631646	0.0066	0.00533333	0.00586667	0.0046	0.0044
1:1635820	0.0058	0.00426667	0.0046	0.00566667	0.0052
1:1640583	0.005	0.0046	0.0048	0.00446667	0.00473333
1:1645713	0.0062	0.00506667	0.0046	0.0042	0.00453333
1:1646535	0.006	0.0048	0.00533333	0.00366667	0.00453333
1:1647124	0.00506667	0.004	0.00533333	0.0048	0.00446667
1:1650662	0.00573333	0.00406667	0.00453333	0.00466667	0.0046
1:1652278	0.00566667	0.005	0.00566666	0.0044	0.00393333
1:1657620	0.00653334	0.00413333	0.00453333	0.00493333	0.00406667
1:1658441	0.00573333	0.0046	0.0048	0.004	0.0046
1:1659320	0.00526667	0.00393333	0.00526667	0.00393333	0.0044
1:1669596	0.00693333	0.00426667	0.0056	0.00473334	0.0042
1:1670555	0.00573333	0.004	0.00406667	0.00366666	0.00453333
1:1671886	0.00633333	0.00453333	0.0046	0.0042	0.00353333
1:1675530	0.0058	0.0056	0.00413333	0.00386667	0.00426667
1:1676756	0.00506667	0.0046	0.00573333	0.0048	0.0054
1:1677733	0.00693333	0.00513333	0.00606667	0.0044	0.00533333
1:1679300	0.00533333	0.00426667	0.00486667	0.00433333	0.00373333
1:1679839	0.00573333	0.00446667	0.00426667	0.00373333	0.00426666
1:1680611	0.00646667	0.00473333	0.00513333	0.004	0.00386667
1:1682584	0.00646667	0.0036	0.00546667	0.0044	0.0048
1:1685880	0.0064	0.0036	0.00413333	0.00486667	0.00493333
1:1687569	0.00506667	0.00473333	0.00546667	0.00366667	0.0048
1:1688036	0.00566667	0.00333333	0.00553333	0.00506667	0.00586667
1:1688556	0.00633333	0.0034	0.00486666	0.00446667	0.00486667
1:1689348	0.00586667	0.00413333	0.00546667	0.005	0.00426666
1:1692585	0.00526667	0.00466667	0.00646667	0.0052	0.00566667
1:1693962	0.00546667	0.00406667	0.00526667	0.00406667	0.00466667
1:1695632	0.00606667	0.00413333	0.00493333	0.00453334	0.005
1:1696195	0.00546667	0.0044	0.00473333	0.0044	0.00426667
1:1698908	0.0056	0.00453333	0.0042	0.0034	0.00386667
1:1702060	0.00586667	0.00433334	0.005	0.00366667	0.00386667
1:1706307	0.00606667	0.00426666	0.00466667	0.004	0.00386667
1:1712040	0.00653333	0.0046	0.00513333	0.00486667	0.00573333
1:1715482	0.0058	0.00413333	0.0046	0.004	0.0048
1:1721138	0.00413333	0.004	0.00386667	0.0052	0.00373334
1:1724273	0.00486667	0.00453333	0.00406667	0.0048	0.00446667
1:1727279	0.0052	0.00473333	0.00413333	0.00333333	0.0046
1:1730547	0.00746667	0.00506667	0.0042	0.004	0.00453334
1:1733691	0.0068	0.0038	0.00513333	0.00426667	0.00413334
1:1736739	0.00533333	0.00506667	0.0048	0.00393333	0.00306667
1:1741712	0.00573333	0.00466667	0.00486667	0.004	0.0042
1:1745428	0.00533333	0.0044	0.0048	0.00486667	0.0048
1:1746860	0.00620001	0.00513333	0.00526667	0.00473333	0.00506667
1:1749998	0.006	0.00426667	0.00473333	0.00466667	0.00413333
1:1752601	0.0056	0.00373333	0.00506667	0.0042	0.00366667
1:1754968	0.00593333	0.00453333	0.0052	0.00573333	0.00506667
1:1757597	0.0058	0.0044	0.00473333	0.0034	0.00386667
1:1761967	0.00546667	0.00553333	0.00526667	0.00453333	0.0046
1:1765043	0.00579999	0.00386667	0.00553333	0.0038	0.00433333
1:1769696	0.0056	0.00373334	0.0056	0.00486667	0.00573333
1:1774342	0.0058	0.00406667	0.0048	0.0036	0.00446667
1:1778134	0.00700001	0.0048	0.0054	0.00353333	0.0048
1:1781251	0.0048	0.0048	0.00506667	0.004	0.00366667
1:1784777	0.00546667	0.00393333	0.00486667	0.005	0.0046
1:1789176	0.00553333	0.00453333	0.00333333	0.00406667	0.0048
1:1792053	0.00526667	0.00426667	0.00573333	0.0042	0.004
1:1794912	0.00586666	0.00426667	0.00586667	0.00506667	0.0056
1:1802755	0.00613333	0.00533333	0.0062	0.005	0.0048
1:1809526	0.00546667	0.00446667	0.00586666	0.0052	0.00406667
1:1810539	0.0052	0.0048	0.0046	0.0048	0.0044
1:1814809	0.0054	0.0048	0.00513333	0.00413333	0.00486667
1:1817641	0.00706667	0.00446667	0.00533333	0.00453333	0.00346667
1:1830748	0.00506667	0.00453333	0.00466667	0.00433333	0.00406667
1:1834781	0.00586667	0.00406667	0.00566667	0.0042	0.0048
1:1836176	0.00526667	0.00473333	0.00506667	0.00433333	0.00473333
1:1839436	0.0062	0.005	0.0052	0.0042	0.005
1:1840531	0.00533333	0.0046	0.00566667	0.0048	0.00366667
1:1842371	0.00620001	0.00426667	0.00426667	0.00533333	0.00446667
1:1845302	0.0056	0.0044	0.00406666	0.00453333	0.00466667
1:1848439	0.00639999	0.0048	0.005	0.00413333	0.00466667
1:1849789	0.00659999	0.00526667	0.00486667	0.00366667	0.00433333
1:1852426	0.00573333	0.0038	0.00466667	0.00506667	0.0044
1:1858907	0.00473333	0.0046	0.00413333	0.00393333	0.0042
1:1863496	0.00633333	0.00506667	0.0046	0.00386667	0.005
1:1870172	0.00606667	0.00433334	0.0048	0.00533333	0.00413333
1:1874181	0.0062	0.0044	0.00426667	0.00466667	0.00526667
1:1878022	0.00626667	0.0046	0.00566667	0.0052	0.00433333
1:1883132	0.00513333	0.0038	0.00433333	0.0044	0.00386666
1:1886288	0.00633333	0.005	0.00446667	0.00453333	0.00333333
1:1890322	0.00553334	0.00506667	0.0056	0.004	0.00386667
1:1895011	0.00626667	0.00406667	0.0042	0.00533333	0.00486667
1:1898967	0.00626667	0.00506667	0.0044	0.00386667	0.00426667
1:1902511	0.00626666	0.0036	0.00506667	0.005	0.0044
1:1905322	0.00613333	0.0044	0.00606667	0.004	0.00506667
1:1909740	0.00593333	0.00426667	0.00466667	0.00346667	0.00486667
1:1917241	0.00586667	0.00366667	0.00453333	0.00446667	0.004
1:1923521	0.0056	0.0042	0.00573333	0.0036	0.00466667
1:1929664	0.00713333	0.00393333	0.0052	0.0046	0.0038
1:1939946	0.0052	0.0048	0.0058	0.0046	0.00506667
1:1951811	0.00553334	0.0042	0.00573334	0.00406667	0.005
1:1954528	0.00706667	0.00426667	0.00493333	0.0054	0.00473334
1:1955537	0.0066	0.00433333	0.00493333	0.00486667	0.0054
1:1960281	0.00686667	0.00393333	0.00553333	0.0058	0.0046
1:1966040	0.0062	0.0042	0.00473333	0.00486667	0.00453333
1:1968406	0.0058	0.00366667	0.00486667	0.00493333	0.00486667
1:1972062	0.0066	0.0032	0.0044	0.005	0.00393333
1:1975502	0.00626667	0.0036	0.0052	0.00473333	0.0036
1:1979359	0.00639999	0.00526667	0.00453333	0.00473333	0.00386667
1:1983510	0.00593333	0.00393333	0.00586667	0.0046	0.00406667
1:1984725	0.00760001	0.00406667	0.00526667	0.00373333	0.0052
1:1989195	0.00513333	0.005	0.00533333	0.00426667	0.00386667
1:1994717	0.00646666	0.00413333	0.00573333	0.00306667	0.00413333
1:1997766	0.00653333	0.00493333	0.00406667	0.00453333	0.00393333
1:2000237	0.00573333	0.00373333	0.00593333	0.00453333	0.00493333
1:2003168	0.0062	0.00373333	0.0058	0.00486667	0.00466667
1:2004090	0.0064	0.00446667	0.00526667	0.00473333	0.00373333
1:2010236	0.006	0.00446667	0.00433333	0.0042	0.0046
1:2014143	0.00553333	0.00453333	0.00513333	0.00453333	0.00473333
1:2015519	0.00566667	0.00586667	0.00566667	0.00446666	0.00473333
1:2023751	0.00666667	0.00426666	0.00433333	0.00466667	0.004
1:2024917	0.00493333	0.00453333	0.00413333	0.00413333	0.00513333
1:2028842	0.0048	0.00446667	0.0046	0.00486666	0.0052
1:2033795	0.00606667	0.0034	0.0044	0.0052	0.00446666
1:2036130	0.00533333	0.0048	0.00566667	0.00513333	0.0054
1:2038100	0.0042	0.0054	0.00553333	0.00506667	0.0048
1:2041271	0.00573333	0.0042	0.00626667	0.0048	0.00433333
1:2047484	0.006	0.00493333	0.0048	0.0048	0.00393333
1:2051702	0.0066	0.0038	0.0058	0.0056	0.00413333
1:2059310	0.00693334	0.005	0.005	0.00486667	0.0042
1:2065249	0.0066	0.00446666	0.00553333	0.00406667	0.00393333
1:2068690	0.00633333	0.00366667	0.00573333	0.00473333	0.00446667
1:2072804	0.00586667	0.00393333	0.00473333	0.0038	0.00506667
1:2076521	0.0056	0.0034	0.00513333	0.005	0.00426667
1:2080108	0.00533333	0.00566667	0.00553333	0.00473333	0.00393333
1:2080939	0.00593333	0.00346667	0.00506667	0.00433333	0.00513333
1:2081569	0.00633333	0.0056	0.0038	0.00446667	0.0048
1:2082139	0.00533333	0.00413333	0.00493333	0.0044	0.00426667
1:2083045	0.00566666	0.0038	0.0046	0.00373333	0.0046
1:2084542	0.00593333	0.0046	0.0046	0.00446667	0.00406667
1:2086121	0.0062	0.0048	0.0042	0.00506667	0.00453333
1:2087561	0.00473333	0.00386667	0.00433334	0.0042	0.00446666
1:2088539	0.0054	0.00426667	0.0062	0.00533333	0.00486667
1:2096344	0.00593334	0.00406667	0.00573333	0.004	0.005
1:2099121	0.00666666	0.00453333	0.0046	0.00486667	0.004
1:2101917	0.00626667	0.0048	0.0046	0.00466667	0.00513333
1:2107796	0.00633333	0.00433333	0.00553333	0.0044	0.0034
1:2109084	0.0058	0.00393333	0.00546667	0.00473333	0.00493333
1:2111650	0.00613333	0.00506667	0.0044	0.00386667	0.0054
1:2114078	0.0062	0.00466667	0.0046	0.00393333	0.00406667
1:2114728	0.0066	0.00646667	0.00566667	0.00433333	0.00446667
1:2119684	0.00553333	0.00446667	0.00466667	0.00533333	0.00426667
1:2124922	0.00533333	0.00393334	0.0046	0.00466667	0.0042
1:2128341	0.00546667	0.00353333	0.00493333	0.00453333	0.00533333
1:2133465	0.0052	0.00453333	0.00533333	0.0046	0.0046
1:2136192	0.00646667	0.00433333	0.0056	0.0044	0.00413333
1:2141449	0.00486667	0.00473333	0.00466667	0.00446667	0.004
1:2144711	0.00573333	0.0044	0.00506666	0.004	0.00593333
1:2155626	0.00606667	0.0054	0.0046	0.00493333	0.00406667
1:2158691	0.00593334	0.00493333	0.00586667	0.00433333	0.00373333
1:2163137	0.00553333	0.00453333	0.00533333	0.00493333	0.00306666
1:2164651	0.00626666	0.00486667	0.00473333	0.0044	0.00453333
1:2168014	0.0064	0.00386667	0.00613333	0.00453334	0.00486667
1:2172213	0.00640001	0.0034	0.0054	0.0036	0.0034
1:2176003	0.00546667	0.0042	0.00473333	0.0036	0.0046
1:2180053	0.0058	0.0042	0.00526666	0.00526667	0.0052
1:2183691	0.00466667	0.00513333	0.005	0.00466667	0.00453333
1:2192489	0.00646667	0.0052	0.0056	0.00466667	0.00446667
1:2199137	0.00673333	0.0056	0.0058	0.00533333	0.0052
1:2203654	0.00633333	0.0034	0.0046	0.0046	0.0044
1:2207979	0.00713333	0.0044	0.005	0.00446667	0.005
1:2214296	0.00693333	0.0052	0.0056	0.0048	0.00533333
1:2217631	0.00633333	0.00466667	0.00526667	0.00453333	0.00433333
1:2219759	0.00553333	0.00406667	0.0046	0.00386667	0.00486667
1:2221312	0.006	0.00453333	0.0066	0.00606667	0.0062
1:2229077	0.00679999	0.00486667	0.00553333	0.0034	0.00346667
1:2233225	0.0052	0.00413333	0.00546667	0.00413333	0.00386667
1:2235492	0.00613333	0.00393333	0.00553333	0.00426666	0.00413333
1:2240729	0.00493333	0.005	0.00353333	0.00513333	0.00446667
1:2241969	0.0064	0.0048	0.00506667	0.00413333	0.00346667
1:2242838	0.00393333	0.00446667	0.00526667	0.00413333	0.0034
1:2244381	0.00513334	0.005	0.0044	0.00453333	0.00413333
1:2245427	0.0046	0.004	0.00553334	0.00533333	0.004
1:2246213	0.00586667	0.0046	0.0054	0.005	0.004
1:2246818	0.00653333	0.00426667	0.0046	0.00473334	0.00433333
1:2247614	0.00566667	0.00526667	0.00473333	0.00326667	0.00333333
1:2248333	0.0054	0.00506667	0.00553334	0.00466667	0.0044
1:2248930	0.0056	0.00473333	0.00446667	0.0052	0.0054
1:2250307	0.00553333	0.00366667	0.0058	0.00473333	0.00493333
1:2251619	0.00546667	0.00466666	0.00533333	0.004	0.00506667
1:2255252	0.00626667	0.00526667	0.00546667	0.0032	0.00506667
1:2256758	0.0062	0.0042	0.00506667	0.00386667	0.0036
1:2257731	0.0056	0.0046	0.00486667	0.0048	0.0042
1:2261566	0.00533333	0.0042	0.00573334	0.00326667	0.006
1:2262467	0.0062	0.0044	0.00453333	0.0042	0.00326667
1:2263230	0.0062	0.00406667	0.00546667	0.0038	0.00426667
1:2266365	0.00506667	0.00473333	0.0052	0.00446667	0.00453333
1:2271642	0.0058	0.00433333	0.0054	0.00353333	0.00373333
1:2273913	0.00626667	0.0054	0.005	0.0042	0.005
1:2275507	0.005	0.0042	0.00493333	0.00413334	0.00366666
1:2276379	0.00573334	0.00393333	0.00533333	0.00426667	0.00453333
1:2279667	0.00673334	0.00526667	0.00486667	0.0046	0.00466666
1:2283350	0.006	0.00346667	0.0042	0.00506667	0.00473333
1:2284595	0.00533333	0.00413333	0.00466667	0.0034	0.00466667
1:2285656	0.00546667	0.004	0.00553333	0.00466667	0.0044
1:2286456	0.00546667	0.0044	0.00526667	0.00386667	0.00406667
1:2287422	0.00653333	0.00486667	0.0046	0.00426667	0.00426667
1:2290833	0.00573333	0.00513333	0.0042	0.0044	0.00426667
1:2291600	0.00659999	0.00486667	0.00513333	0.00406667	0.00493333
1:2292393	0.00586667	0.00466667	0.00486667	0.0046	0.00526667
1:2293205	0.006	0.00506667	0.00473333	0.00393333	0.00493334
1:2294805	0.00606667	0.00426667	0.0058	0.00413334	0.00446667
1:2295577	0.00413333	0.00426667	0.00493333	0.004	0.00533333
1:2298740	0.00446667	0.0042	0.0054	0.00426667	0.00393333
1:2299194	0.00486667	0.00473333	0.00526666	0.00473333	0.00433333
1:2300743	0.00593333	0.0042	0.00526667	0.0044	0.00386666
1:2302955	0.00586667	0.00493333	0.00526667	0.00453333	0.00426667
1:2304040	0.0066	0.00453333	0.00486667	0.00546667	0.0036
1:2304587	0.0058	0.0048	0.00493333	0.00453333	0.0046
1:2305128	0.00660001	0.00426667	0.00473334	0.00413333	0.0044
1:2307956	0.00553333	0.00473333	0.00486667	0.00493333	0.0038
1:2310667	0.00506667	0.00373333	0.0052	0.00386667	0.0046
1:2313186	0.00506667	0.00466667	0.0048	0.00546667	0.00373333
1:2321768	0.0058	0.00486667	0.00426667	0.00426667	0.00433333
1:2324785	0.00646667	0.00446667	0.0052	0.00466667	0.00486667
1:2327877	0.00533333	0.00393333	0.00546667	0.00366667	0.00493333
1:2328632	0.00586667	0.00486667	0.00573333	0.00486667	0.00473333
1:2332754	0.00653333	0.00533333	0.00546667	0.00413333	0.00373333
1:2336135	0.00540001	0.005	0.0054	0.004	0.00513333
1:2340545	0.00473333	0.00473333	0.00553333	0.0038	0.00366667
1:2344023	0.00673333	0.00393333	0.00466666	0.00453333	0.00433333
1:2348424	0.00580001	0.00473333	0.0038	0.00526667	0.004
1:2353140	0.0052	0.0046	0.00473333	0.00406667	0.00373333
1:2357315	0.00693334	0.0054	0.00453333	0.00486667	0.00446667
1:2358460	0.00553333	0.005	0.0054	0.00426667	0.00413333
1:2363479	0.00566667	0.00406666	0.00486666	0.00466667	0.00393333
1:2369876	0.00640001	0.00393333	0.00533333	0.005	0.0056
1:2372646	0.0056	0.0038	0.00533333	0.005	0.00506667
1:2375467	0.006	0.00393333	0.00473333	0.00386667	0.00333333
1:2376145	0.00666667	0.00466667	0.00466667	0.00533333	0.00453333
1:2377720	0.00533333	0.00393333	0.00533333	0.00546667	0.00433333
1:2378673	0.00586667	0.0044	0.0048	0.00386667	0.0058
1:2384097	0.00493333	0.00426667	0.00486667	0.00506667	0.00533333
1:2387687	0.00546666	0.00486667	0.0048	0.004	0.0042
1:2390062	0.00606667	0.0038	0.0036	0.0044	0.00413333
1:2393796	0.00553334	0.0048	0.00526667	0.00406667	0.004
1:2395515	0.0062	0.00426667	0.00566667	0.00473333	0.00446667
1:2396784	0.0054	0.00493333	0.0058	0.00353333	0.00453333
1:2404092	0.00666667	0.00446667	0.00406667	0.00406667	0.00406667
1:2413187	0.00546667	0.00353333	0.0054	0.00433333	0.00486667
1:2416447	0.0064	0.00453333	0.0058	0.00513333	0.00406666
1:2422438	0.00633333	0.0042	0.0048	0.0048	0.00446667
1:2425663	0.00593333	0.00406667	0.00533333	0.00513333	0.00393333
1:2429192	0.0064	0.00533333	0.00493333	0.00433333	0.00433333
1:2432729	0.0064	0.00346667	0.0056	0.00486667	0.0046
1:2437524	0.00553333	0.0048	0.0046	0.0052	0.0036
1:2440864	0.00566667	0.00386667	0.00406667	0.00453333	0.00406667
1:2445051	0.00686667	0.0044	0.0052	0.0034	0.00506667
1:2448336	0.00686667	0.00446667	0.005	0.00506667	0.00433333
1:2452019	0.00546667	0.0048	0.00546667	0.00486667	0.00446667
1:2455486	0.006	0.0044	0.00406667	0.00433333	0.0046
1:2459049	0.00613333	0.00433333	0.00473333	0.0044	0.005
1:2462288	0.00513333	0.00426666	0.00453333	0.0054	0.00413333
1:2465308	0.00566667	0.00513333	0.004	0.00553333	0.0038
1:2468447	0.0056	0.0044	0.00546667	0.0034	0.00506667
1:2472607	0.0062	0.00413333	0.00526667	0.00353333	0.00466667
1:2479646	0.00713333	0.00426667	0.00533333	0.0038	0.00406667
1:2482685	0.00586667	0.00386667	0.0056	0.00493333	0.00506667
1:2484658	0.00673333	0.00406667	0.00433333	0.00373333	0.00506667
1:2490945	0.00533333	0.004	0.0054	0.00466667	0.0052
1:2495039	0.0052	0.005	0.00433333	0.00446667	0.0042
1:2507159	0.00573333	0.0048	0.00573333	0.00466667	0.00506667
1:2516434	0.00679999	0.00513333	0.00506667	0.00393333	0.00506667
1:2520976	0.00653334	0.00426667	0.00566667	0.00426666	0.0044
1:2524170	0.0062	0.0042	0.00573334	0.00453333	0.0044
1:2531404	0.00593333	0.0052	0.00513333	0.004	0.0034
1:2535083	0.0062	0.00453333	0.00506667	0.0042	0.00513333
1:2540189	0.00613333	0.00426666	0.0056	0.00386667	0.0042
1:2548682	0.00566667	0.00446667	0.00506667	0.00453334	0.00493333
1:2551347	0.00573333	0.00473333	0.00473333	0.0048	0.00406667
1:2557583	0.00546667	0.00466667	0.00393333	0.00453333	0.00446667
1:2561758	0.0066	0.005	0.0056	0.0044	0.00373333
1:2564740	0.00639999	0.00526667	0.00553333	0.00446667	0.0052
1:2574098	0.006	0.00506667	0.0056	0.00453333	0.00426667
1:2581964	0.00586667	0.0038	0.005	0.00486667	0.005
1:2588210	0.00633333	0.00426667	0.0052	0.0048	0.00453333
1:2589312	0.0056	0.0044	0.0054	0.00446667	0.00406667
1:2592362	0.0056	0.0046	0.0054	0.005	0.00506666
1:2594963	0.00593333	0.00413333	0.00626667	0.0048	0.0044
1:2603369	0.00506667	0.00393333	0.00573333	0.00413333	0.00453333
1:2604669	0.00486667	0.00386667	0.00413333	0.00526667	0.00473333
1:2606824	0.00513333	0.00346667	0.00493333	0.004	0.0048
1:2607582	0.0052	0.00486667	0.00466667	0.00413333	0.0042
1:2608332	0.0052	0.00486667	0.00546667	0.00506667	0.00493333
1:2610578	0.00666666	0.0036	0.0054	0.0052	0.00433333
1:2614630	0.00613333	0.0046	0.00466667	0.0046	0.0042
1:2617150	0.00573333	0.00353333	0.005	0.0034	0.00466667
1:2624808	0.0054	0.00553333	0.0052	0.0048	0.0046
1:2626516	0.00533333	0.00406667	0.0046	0.00393333	0.00446667
1:2629152	0.00639999	0.0048	0.00446667	0.00513333	0.00466667
1:2633403	0.00613333	0.005	0.00553333	0.00413333	0.00406667
1:2637239	0.00606667	0.00426666	0.00493333	0.00413333	0.00493333
1:2641517	0.00606667	0.0048	0.0046	0.00406667	0.00426667
1:2645413	0.00566667	0.00466667	0.00453333	0.00473333	0.004
1:2652685	0.00586667	0.0046	0.00526667	0.004	0.00466667
1:2658776	0.00546667	0.00473333	0.00546667	0.00466667	0.00473333
1:2666469	0.0064	0.00506667	0.00653333	0.00473333	0.00506666
1:2670399	0.0064	0.00366667	0.00493333	0.0046	0.0042
1:2678593	0.0046	0.00453333	0.00486667	0.00446667	0.004
1:2684256	0.00666667	0.00426667	0.005	0.004	0.00553333
1:2687430	0.00553334	0.00506667	0.00606667	0.00366667	0.0042
1:2691956	0.00546667	0.00406667	0.0048	0.00366667	0.00526667
1:2695515	0.00586666	0.0046	0.004	0.00446667	0.005
1:2698904	0.0054	0.0034	0.00466667	0.00326667	0.00446667
1:2699455	0.00466667	0.00413333	0.0044	0.00513333	0.00373333
1:2703664	0.00553333	0.00426667	0.005	0.00493333	0.00426667
1:2707688	0.00686667	0.0042	0.00486667	0.00333333	0.00413333
1:2710801	0.00706667	0.00533333	0.00453333	0.0042	0.00513333
1:2714762	0.00586667	0.00473334	0.00486667	0.00433333	0.00386667
1:2719642	0.00573333	0.00526666	0.00573333	0.00406667	0.00386667
1:2728889	0.00573333	0.00486667	0.00646667	0.00453333	0.00373333
1:2733184	0.006	0.00466667	0.0052	0.00466667	0.00426667
1:2738165	0.00593333	0.00426667	0.0044	0.00466667	0.00373333
1:2743449	0.00473333	0.0038	0.0052	0.00353333	0.0042
1:2746233	0.006	0.004	0.00506667	0.00426667	0.0048
1:2749113	0.0064	0.0038	0.00386667	0.005	0.0042
1:2750919	0.00566667	0.0046	0.0054	0.0042	0.00373333
1:2751701	0.00606667	0.00506667	0.00573333	0.00546667	0.0052
1:2752599	0.00613334	0.00453333	0.00473333	0.00513333	0.00393333
1:2757434	0.00633333	0.00466667	0.0048	0.00413333	0.0048
1:2760325	0.00573333	0.0036	0.00513333	0.0042	0.004
1:2761959	0.0058	0.00466667	0.0056	0.00506667	0.00426667
1:2767613	0.00526667	0.00426667	0.0046	0.00426667	0.004
1:2769164	0.00566667	0.00466667	0.0042	0.00386667	0.0036
1:2769701	0.006	0.003	0.00493333	0.0044	0.00413333
1:2790844	0.00526667	0.00413333	0.0058	0.00446667	0.00473333
1:2799204	0.00653333	0.004	0.00613333	0.00466667	0.00413333
1:2804464	0.00586667	0.0056	0.00506667	0.00426667	0.00473333
1:2809407	0.00573333	0.00286667	0.00566666	0.00493333	0.004
1:2812467	0.00613333	0.00366667	0.00473333	0.00453333	0.00486667
1:2817262	0.00533333	0.0038	0.00566667	0.004	0.00413333
1:2820549	0.00546667	0.00506666	0.00553333	0.00553333	0.00473333
1:2824770	0.00700001	0.0052	0.00486667	0.00413333	0.00433333
1:2833902	0.00513333	0.0046	0.00493334	0.00426667	0.00406667
1:2837653	0.00619999	0.00406667	0.00486667	0.00426667	0.00366667
1:2840766	0.00633334	0.00493333	0.00506667	0.004	0.0042
1:2848684	0.00740001	0.00566667	0.0052	0.00346667	0.0052
1:2853983	0.00713333	0.00373333	0.0044	0.0044	0.00506667
1:2856444	0.00613333	0.00533333	0.00546667	0.00513333	0.0044
1:2859590	0.00506667	0.00353333	0.00553333	0.00493333	0.00453333
1:2865612	0.0058	0.00366667	0.005	0.00453333	0.00373333
1:2871819	0.00553333	0.00346667	0.00493333	0.0044	0.00426667
1:2872431	0.00526667	0.0046	0.00506667	0.00426667	0.00506667
1:2876132	0.0064	0.0048	0.00546667	0.005	0.005
1:2883197	0.00633333	0.00506667	0.00626667	0.00406667	0.00453333
1:2886442	0.0052	0.00526666	0.0056	0.00453334	0.004
1:2889586	0.00673333	0.005	0.00506667	0.0042	0.0038
1:2892627	0.00653333	0.00473333	0.00486667	0.00413333	0.00433334
1:2899429	0.005	0.00546667	0.0048	0.00426667	0.00446667
1:2903152	0.00566667	0.00466667	0.00506666	0.0042	0.00393333
1:2907493	0.00666667	0.00413333	0.00526667	0.00486667	0.00486667
1:2926883	0.00719999	0.00406667	0.005	0.00586667	0.00526667
1:2931328	0.005	0.00453333	0.0046	0.00366667	0.00473333
1:2931911	0.00653334	0.00473333	0.00473333	0.00486667	0.00426667
1:2936612	0.00766667	0.00366667	0.0052	0.00473333	0.004
1:2942099	0.0068	0.0048	0.00446666	0.004	0.00426667
1:2946268	0.00666667	0.00406667	0.00506667	0.00513333	0.004
1:2948988	0.00713333	0.00386667	0.00506667	0.00406667	0.0044
1:2952000	0.00453333	0.00413333	0.0054	0.00486667	0.0034
1:2957562	0.0066	0.0042	0.00513333	0.00426667	0.00466667
1:2963532	0.00606667	0.0062	0.00526667	0.00493333	0.00446667
1:2966455	0.00526667	0.00466667	0.00566667	0.00433333	0.00426667
1:2967638	0.0054	0.00406667	0.00486667	0.0044	0.00386667
1:2970645	0.00546667	0.00406667	0.00533333	0.00526667	0.00486667
1:2973430	0.00586667	0.0048	0.0046	0.00553334	0.005
1:2974184	0.00593333	0.00473333	0.005	0.00473333	0.0046
1:2975582	0.00633333	0.0044	0.00633333	0.005	0.0046
1:2980278	0.005	0.00386667	0.00453333	0.0042	0.0048
1:2981856	0.00553333	0.0044	0.00466667	0.00466667	0.00346667
1:2983080	0.00593333	0.00353333	0.00493333	0.0048	0.004
1:2987651	0.00686667	0.00493333	0.00413333	0.00486667	0.00493333
1:2990622	0.00646667	0.0046	0.0056	0.00526667	0.00466667
1:2994213	0.00553333	0.0044	0.0058	0.00493333	0.0044
1:2996976	0.00766666	0.00406667	0.00453333	0.0038	0.0052
1:2997741	0.0072	0.00513333	0.0062	0.00406667	0.00586667
1:2999989	0.00693333	0.00433333	0.00473333	0.00493333	0.00473333
1:3004195	0.00613333	0.00513333	0.00406667	0.00586667	0.0056
1:3006030	0.00586667	0.00433333	0.00546667	0.0042	0.0052
1:3006538	0.00746666	0.00453333	0.00466667	0.00466667	0.00466667
1:3007054	0.00653333	0.0048	0.00606667	0.00366667	0.00526667
1:3010910	0.0052	0.00333333	0.00513333	0.00466667	0.00453333
1:3011742	0.00553333	0.0054	0.00533333	0.00426667	0.0046
1:3012336	0.00533333	0.00413333	0.006	0.0052	0.00466667
1:3013538	0.00546667	0.0038	0.0044	0.00493333	0.0042
1:3014481	0.006	0.0036	0.00486667	0.0044	0.00473333
1:3016459	0.00813333	0.00413333	0.00593333	0.0036	0.004
1:3017401	0.00673333	0.00506667	0.00473333	0.00433333	0.00446667
1:3018314	0.00546666	0.0042	0.0052	0.005	0.0056
1:3019898	0.0068	0.00466667	0.00506667	0.0042	0.00313333
1:3021052	0.0064	0.00433333	0.0054	0.00453333	0.00446667
1:3022400	0.00626667	0.00433333	0.0052	0.00433333	0.00473333
1:3024394	0.00626667	0.004	0.00486667	0.00433333	0.0034
1:3026020	0.00653333	0.0042	0.00513333	0.00493333	0.00446667
1:3026992	0.0056	0.005	0.00553333	0.00473333	0.0038
1:3028026	0.00666667	0.0052	0.00526667	0.004	0.00506667
1:3029662	0.00586667	0.00386667	0.006	0.00466667	0.00453333
1:3033433	0.0062	0.0042	0.0054	0.00473333	0.0048
1:3036933	0.00653333	0.00506667	0.00413333	0.004	0.00493333
1:3040594	0.00626667	0.00433333	0.00493333	0.00453333	0.00466667
1:3043106	0.00566667	0.00393333	0.00533333	0.00373333	0.00426667
1:3047348	0.00573333	0.0048	0.0056	0.0044	0.00426667
1:3047807	0.00546667	0.00406667	0.00573333	0.00453333	0.00446667
1:3048391	0.00626667	0.00473333	0.00493333	0.0048	0.00506667
1:3051470	0.00686667	0.005	0.00513333	0.00506667	0.00406667
1:3056961	0.00526667	0.0042	0.00493333	0.00446667	0.0042
1:3057605	0.00626666	0.00446667	0.00426667	0.00466667	0.00346667
1:3058587	0.00546667	0.00466667	0.00473333	0.0052	0.00493333
1:3059878	0.0052	0.00433333	0.00626667	0.00466667	0.0036
1:3061005	0.0058	0.00493333	0.00393333	0.00446667	0.0044
1:3061615	0.00486666	0.00366667	0.00566667	0.0042	0.00426667
1:3062335	0.00573333	0.00353333	0.005	0.00426667	0.00366667
1:3066172	0.00593333	0.00413333	0.0056	0.00393333	0.005
1:3067330	0.00673334	0.00546667	0.00526667	0.0038	0.0038
1:3069718	0.0056	0.00446667	0.00446667	0.004	0.00406667
1:3072923	0.0056	0.0044	0.00573333	0.0046	0.004
1:3074019	0.00546667	0.00393333	0.00486667	0.0042	0.00486667
1:3076542	0.00706666	0.0046	0.00606667	0.0042	0.0046
1:3078254	0.0054	0.0056	0.0046	0.00533333	0.00493333
1:3078703	0.00553333	0.0044	0.0046	0.00386667	0.0048
1:3081314	0.00726667	0.00413333	0.0054	0.00466667	0.00386667
1:3092893	0.00693333	0.00366666	0.00466667	0.00486667	0.0042
1:3099051	0.00586667	0.00413333	0.00573333	0.0038	0.0042
1:3101856	0.0048	0.00446667	0.00506666	0.00433333	0.00573333
1:3104592	0.00653334	0.00426667	0.0052	0.0042	0.00533333
1:3108736	0.00593333	0.0048	0.0044	0.00446667	0.0042
1:3109788	0.00726667	0.0048	0.0048	0.00453333	0.004
1:3110267	0.0066	0.0046	0.00533333	0.0038	0.00553333
1:3111267	0.00533333	0.00486667	0.00446667	0.00433333	0.00366666
1:3112790	0.00566667	0.0036	0.00426667	0.00493333	0.004
1:3113476	0.0058	0.0044	0.00546667	0.00466667	0.0042
1:3114153	0.00673333	0.00466667	0.00466667	0.00413333	0.0054
1:3114612	0.00606666	0.00486667	0.00486667	0.00446667	0.00446667
1:3115155	0.0064	0.00346667	0.00526667	0.00466667	0.00486667
1:3116093	0.00626666	0.00466667	0.00466667	0.004	0.00473333
1:3116796	0.00573333	0.00446667	0.0044	0.00413333	0.00486667
1:3118286	0.006	0.00353333	0.00453333	0.0046	0.00546666
1:3118951	0.00619999	0.0044	0.00553333	0.00426667	0.004
1:3119537	0.006	0.0052	0.00513333	0.004	0.00466667
1:3120304	0.00506667	0.0046	0.00566667	0.00513333	0.0046
1:3122500	0.00486667	0.0048	0.00506667	0.00513333	0.005
1:3123646	0.00626667	0.00366667	0.0054	0.0046	0.00393333
1:3124695	0.00646667	0.00433333	0.00433334	0.00466667	0.0052
1:3125321	0.005	0.00386667	0.00566667	0.00533333	0.0044
1:3127014	0.006	0.0058	0.00453333	0.0046	0.00406667
1:3127796	0.00553333	0.0044	0.0042	0.00453333	0.00406667
1:3128547	0.00633333	0.00366667	0.00433333	0.004	0.00466667
1:3129185	0.0064	0.00473333	0.005	0.0046	0.00426667
1:3130972	0.00586667	0.0046	0.00506666	0.00453333	0.00406667
1:3131867	0.00533333	0.00413333	0.00373333	0.0044	0.00453333
1:3132723	0.00633333	0.0044	0.00526667	0.00386667	0.00413333
1:3134580	0.00566667	0.00426667	0.00533333	0.00393333	0.00446667
1:3135408	0.00679999	0.00386667	0.00526667	0.00426667	0.00433333
1:3136967	0.006	0.00393333	0.00506667	0.00446667	0.00426667
1:3137662	0.00513333	0.00333333	0.005	0.00413333	0.0038
1:3138455	0.00673334	0.00453333	0.00446667	0.00406667	0.0044
1:3139149	0.00613333	0.00506667	0.00593333	0.0044	0.00433333
1:3140099	0.00573333	0.00413333	0.00573333	0.00513333	0.00473333
1:3140986	0.0064	0.00446667	0.0042	0.0042	0.00466667
1:3141764	0.00526667	0.00553333	0.00473333	0.00453333	0.00533333
1:3142372	0.0054	0.00393333	0.0046	0.00426667	0.00373333
1:3144779	0.00473333	0.0052	0.00573333	0.00433333	0.005
1:3147141	0.0058	0.00446667	0.00433333	0.00406667	0.00453333
1:3147689	0.00653333	0.00446667	0.0058	0.005	0.00466667
1:3149480	0.0064	0.00373333	0.00553333	0.00453333	0.00493333
1:3150284	0.006	0.00393333	0.00453333	0.00466667	0.00346667
1:3151844	0.0062	0.00326667	0.005	0.0038	0.00466666
1:3152641	0.00533333	0.0044	0.005	0.005	0.00386667
1:3153221	0.00600001	0.0044	0.0046	0.0036	0.00346667
1:3158066	0.00493333	0.00553333	0.0048	0.00546666	0.0046
1:3160224	0.00513333	0.00426667	0.00553333	0.00426667	0.0046
1:3160824	0.00560001	0.00413334	0.00426667	0.00533333	0.004
1:3161869	0.00706667	0.00493333	0.00513333	0.00406667	0.00473333
1:3167586	0.00606667	0.00286667	0.00553333	0.0046	0.00466667
1:3168711	0.00566667	0.00453333	0.00526667	0.00433333	0.00453333
1:3170073	0.00553333	0.005	0.0046	0.0042	0.0044
1:3172295	0.00626667	0.00413333	0.00393333	0.00373333	0.005
1:3174118	0.00566667	0.0044	0.00566667	0.00546667	0.00473333
1:3175831	0.00546666	0.00446667	0.00433334	0.0036	0.00393333
1:3179438	0.006	0.00433333	0.00473333	0.00566667	0.00466667
1:3182687	0.0058	0.00446667	0.00546667	0.00453333	0.00393333
1:3184386	0.0058	0.00426666	0.00473333	0.00433334	0.00406667
1:3185901	0.0058	0.0046	0.0054	0.00366667	0.00373333
1:3187763	0.00666667	0.00513333	0.00533333	0.0044	0.00366667
1:3188350	0.00706667	0.00373333	0.0052	0.0048	0.00466667
1:3189706	0.0064	0.0048	0.00473333	0.0052	0.0044
1:3190676	0.0062	0.00386667	0.00426667	0.0044	0.00386667
1:3192208	0.00573333	0.00453333	0.00433333	0.00366667	0.00546667
1:3193143	0.0048	0.0044	0.00526667	0.0042	0.0054
1:3195860	0.00473333	0.0044	0.0048	0.00433333	0.00293333
1:3198004	0.00613333	0.004	0.00586666	0.00406667	0.00453333
1:3204171	0.00606667	0.0054	0.00466667	0.0046	0.00373333
1:3205820	0.006	0.004	0.00466667	0.0044	0.00526667
1:3206855	0.00746667	0.0046	0.00506667	0.00446667	0.0044
1:3208431	0.00653333	0.00446667	0.00573333	0.00426667	0.00413333
1:3209560	0.00633333	0.00506667	0.00493334	0.00513333	0.00373334
1:3210484	0.00666667	0.004	0.00546667	0.0046	0.00446667
1:3211445	0.00673333	0.00446667	0.0042	0.0048	0.00426667
1:3214868	0.0052	0.00386667	0.00513333	0.00433333	0.0044
1:3223919	0.0058	0.00453333	0.00366667	0.00493333	0.00473333
1:3230359	0.00699999	0.00446667	0.00546667	0.00606667	0.00566667
1:3234527	0.00553333	0.00433333	0.00506667	0.00333333	0.00453333
1:3235805	0.00633334	0.0046	0.0058	0.00526667	0.004
1:3239130	0.00679999	0.0046	0.00566667	0.00526667	0.00493333
1:3242697	0.0066	0.004	0.003	0.00433333	0.0056
1:3243390	0.00539999	0.00433333	0.00426667	0.00473333	0.00453334
1:3245141	0.00653334	0.00433333	0.0052	0.00473333	0.00466667
1:3246011	0.00493333	0.0048	0.0058	0.0046	0.00433333
1:3247239	0.006	0.00426667	0.00573333	0.004	0.00426666
1:3250506	0.00586667	0.00373333	0.005	0.00453333	0.00393333
1:3255501	0.00626667	0.00426667	0.00513333	0.00446667	0.00473333
1:3259694	0.0062	0.00413333	0.00673333	0.00513333	0.0044
1:3260370	0.0054	0.00433333	0.006	0.00413333	0.00393333
1:3260909	0.0068	0.00366667	0.00533333	0.00466667	0.00466667
1:3261757	0.0044	0.00326667	0.00506667	0.00406667	0.00473333
1:3262859	0.0064	0.004	0.00506667	0.0046	0.00433334
1:3263609	0.0062	0.004	0.00433333	0.0046	0.00466667
1:3264758	0.00653333	0.00426667	0.005	0.00433333	0.0036
1:3267454	0.0062	0.00473333	0.00506667	0.00433333	0.0048
1:3276544	0.0048	0.0042	0.00513333	0.00466667	0.004
1:3279233	0.0052	0.00393333	0.00566667	0.00413333	0.00466667
1:3280222	0.00659999	0.00513333	0.00486667	0.00446667	0.00433334
1:3283746	0.0056	0.0042	0.0054	0.0046	0.00526666
1:3290224	0.0058	0.00406667	0.00466667	0.004	0.00526667
1:3293441	0.006	0.00433333	0.005	0.00293333	0.0044
1:3296794	0.00620001	0.00466667	0.0038	0.00333333	0.00473333
1:3297547	0.0058	0.00426667	0.00546667	0.00486667	0.00373333
1:3299627	0.00706667	0.00473333	0.00466667	0.00406667	0.00433333
1:3300660	0.00666667	0.00393333	0.00486667	0.00486667	0.0042
1:3303269	0.0054	0.00433333	0.0058	0.0046	0.00466667
1:3303892	0.00493333	0.00513333	0.0044	0.00546667	0.00473333
1:3305139	0.00686667	0.00413333	0.0052	0.0042	0.0048
1:3306178	0.00653333	0.00413333	0.00513333	0.00486667	0.00453333
1:3310912	0.005	0.0046	0.00533333	0.0042	0.00413333
1:3313010	0.00466667	0.00393333	0.00506667	0.00413333	0.00433333
1:3315582	0.0054	0.00393333	0.00573333	0.00346667	0.00453333
1:3323416	0.0052	0.00433333	0.0046	0.00493333	0.00366667
1:3332326	0.00573333	0.00386667	0.0054	0.00426667	0.0054
1:3333094	0.00553333	0.0052	0.00513333	0.00386667	0.0042
1:3339918	0.00653333	0.0044	0.00446667	0.00426667	0.0038
1:3352717	0.00546667	0.00406667	0.00526667	0.00386667	0.00493334
1:3358780	0.0058	0.005	0.0054	0.00453333	0.0038
1:3359968	0.00706667	0.00466667	0.00553333	0.0042	0.00526667
1:3361607	0.00646667	0.00433334	0.004	0.00393333	0.0058
1:3363236	0.00613333	0.00386667	0.00493333	0.00466667	0.005
1:3365623	0.00613333	0.0046	0.00506667	0.0038	0.0042
1:3366622	0.006	0.00393333	0.00533333	0.00446667	0.0054
1:3370777	0.0054	0.004	0.00486667	0.0054	0.0046
1:3377460	0.00486667	0.00453334	0.0046	0.00433333	0.00513333
1:3379063	0.005	0.00393333	0.00546667	0.00506667	0.00386667
1:3381579	0.00606667	0.00413333	0.00526667	0.00386667	0.00453333
1:3386752	0.00666667	0.00486667	0.00473333	0.00386667	0.0046
1:3388764	0.00526667	0.00553333	0.0044	0.0046	0.0044
1:3389765	0.0054	0.00553333	0.00546667	0.0062	0.00473333
1:3393271	0.006	0.00433333	0.00486667	0.0036	0.00446667
1:3396953	0.00606667	0.005	0.00593333	0.0044	0.0042
1:3400300	0.00646667	0.00466667	0.00633333	0.00433333	0.0044
1:3401191	0.0062	0.00466666	0.0058	0.00406667	0.00486667
1:3403864	0.007	0.00386667	0.0056	0.00426667	0.00506667
1:3409942	0.0054	0.00433333	0.00473333	0.00373333	0.005
1:3414002	0.00626667	0.00426667	0.00553333	0.00466667	0.00446667
1:3415343	0.00613333	0.00453333	0.00466667	0.00453333	0.00433333
1:3418835	0.0056	0.00433333	0.00506667	0.00406667	0.0042
1:3421834	0.00526667	0.00413334	0.0054	0.00453333	0.00453333
1:3425621	0.00633333	0.0038	0.00553333	0.00606667	0.0052
1:3426355	0.00546667	0.0048	0.0048	0.00553333	0.00373333
1:3430450	0.00666667	0.00466667	0.0046	0.005	0.00446667
1:3431611	0.00426667	0.00513334	0.00546667	0.00453333	0.0056
1:3432215	0.00553333	0.00433333	0.00566667	0.00446667	0.00366667
1:3433143	0.00760001	0.00466667	0.00566667	0.00433333	0.00366667
1:3433896	0.00613333	0.00393333	0.0036	0.00573333	0.00466667
1:3434539	0.00586667	0.00393333	0.0058	0.00493333	0.00486667
1:3439042	0.00626667	0.00393333	0.0054	0.0038	0.00386667
1:3444984	0.00573333	0.00433333	0.0048	0.0042	0.0054
1:3446751	0.00433333	0.00473333	0.00606667	0.00426666	0.0044
1:3448401	0.00546667	0.00513333	0.00553333	0.00506667	0.00406667
1:3453310	0.00666666	0.00393333	0.00613333	0.00526667	0.00526667
1:3458428	0.00573333	0.00426667	0.005	0.00573333	0.00346667
1:3459243	0.00586667	0.00486667	0.0044	0.00446667	0.0046
1:3467325	0.00673333	0.00473333	0.00626667	0.00566667	0.00433333
1:3469452	0.00586667	0.00533333	0.00606666	0.00546667	0.00493333
1:3470316	0.00613333	0.00353333	0.00613333	0.00466667	0.00453334
1:3471349	0.00493333	0.00426667	0.00513333	0.00406667	0.00333333
1:3472461	0.0062	0.00486667	0.00546667	0.00353333	0.00373333
1:3474353	0.0064	0.00453333	0.00546667	0.0048	0.0042
1:3474957	0.00626667	0.00526667	0.00453333	0.00346666	0.00453333
1:3475914	0.0062	0.00433333	0.0058	0.00446667	0.00433333
1:3476698	0.0056	0.00406667	0.006	0.00533333	0.00313333
1:3477637	0.0064	0.0042	0.00566667	0.00413333	0.00406667
1:3478487	0.00633333	0.00606667	0.00453333	0.00513333	0.0042
1:3479402	0.00673333	0.00473333	0.00386667	0.003	0.00513333
1:3480350	0.00539999	0.0044	0.00493333	0.0036	0.00466666
1:3481082	0.00593333	0.0046	0.00553333	0.00486667	0.00473333
1:3482746	0.00446667	0.0048	0.0052	0.00393333	0.00426667
1:3483574	0.00586667	0.00453333	0.00526667	0.0048	0.0052
1:3487080	0.00646667	0.005	0.00486666	0.006	0.00486667
1:3487842	0.007	0.00513333	0.0056	0.0042	0.0042
1:3489014	0.00593333	0.00446667	0.00606667	0.00433334	0.0046
1:3489806	0.00700001	0.0044	0.0052	0.00353333	0.00466666
1:3492221	0.00533333	0.00526667	0.00533333	0.00446667	0.00453333
1:3499117	0.00706667	0.0042	0.00606667	0.0048	0.00566667
1:3500633	0.0044	0.00426667	0.00666667	0.0044	0.00553333
1:3504642	0.00486667	0.00486667	0.00513333	0.00573333	0.0046
1:3507357	0.0064	0.0034	0.00533333	0.00486667	0.00546666
1:3510080	0.0064	0.00473334	0.00453333	0.0052	0.00453333
1:3512585	0.00606667	0.00533334	0.0054	0.0048	0.0046
1:3514683	0.006	0.00373333	0.00553333	0.00386667	0.00453333
1:3515685	0.0062	0.00506667	0.00606667	0.0046	0.004
1:3516376	0.00553333	0.0046	0.00513333	0.00486667	0.00433333
1:3520298	0.00606667	0.00506667	0.00453334	0.005	0.0042
1:3523734	0.0046	0.00373333	0.0054	0.005	0.0042
1:3526012	0.00593333	0.00493333	0.00566667	0.0048	0.00393333
1:3526809	0.00553333	0.00393333	0.005	0.00393333	0.00473333
1:3529264	0.0074	0.004	0.00386667	0.00426667	0.00386667
1:3529742	0.0056	0.00553333	0.0054	0.0042	0.0048
1:3530499	0.0056	0.00506667	0.0048	0.00446667	0.005
1:3531671	0.00533333	0.0048	0.00546667	0.00386667	0.00513333
1:3533462	0.00620001	0.00393334	0.0058	0.00413333	0.00466667
1:3534783	0.00653333	0.00453333	0.00593333	0.00413333	0.00426667
1:3538224	0.00613333	0.0046	0.00493333	0.0054	0.00406667
1:3543818	0.005	0.00406667	0.00473333	0.00386667	0.00413333
1:3546524	0.00606667	0.00466667	0.0048	0.00426667	0.0048
1:3549651	0.00753333	0.00426667	0.00473334	0.00506667	0.00313333
1:3560291	0.00573333	0.00466667	0.00473333	0.00566667	0.00546667
1:3562822	0.0058	0.00506667	0.00466667	0.0038	0.00486667
1:3565545	0.0056	0.00486667	0.00406667	0.0052	0.00446667
1:3568742	0.0064	0.0032	0.0054	0.00493333	0.00446667
1:3571578	0.00586667	0.004	0.0058	0.0042	0.00446667
1:3574195	0.0056	0.0034	0.0052	0.00393333	0.0038
1:3575427	0.00646667	0.0048	0.00433333	0.0036	0.0048
1:3579296	0.0052	0.0044	0.00526667	0.00426667	0.00406667
1:3581059	0.00553333	0.0046	0.0056	0.00533333	0.00426667
1:3587305	0.00513333	0.004	0.0054	0.00433333	0.0042
1:3590926	0.00526667	0.0036	0.00546667	0.00406667	0.00446667
1:3594958	0.00606667	0.0048	0.00453333	0.00446667	0.00493333
1:3595729	0.00553334	0.0036	0.00566667	0.0052	0.00406667
1:3597939	0.00506667	0.00546667	0.00526667	0.00526667	0.00353333
1:3598843	0.00633333	0.00493333	0.0056	0.00546667	0.00353333
1:3603239	0.00613333	0.0036	0.004	0.004	0.00406667
1:3604815	0.006	0.0036	0.00526667	0.0046	0.00493333
1:3609125	0.00646667	0.00466667	0.00413333	0.00466667	0.00546667
1:3611248	0.0054	0.00453333	0.00533333	0.00446666	0.00486667
1:3613782	0.00613333	0.00473333	0.0046	0.00453333	0.00346667
1:3616076	0.00526667	0.00386667	0.004	0.00366667	0.00433333
1:3617004	0.00593333	0.00453333	0.00486667	0.0054	0.00513334
1:3619938	0.00573333	0.00386667	0.006	0.00433333	0.00506667
1:3620513	0.00493333	0.0044	0.00526667	0.00346667	0.00446667
1:3626138	0.00533333	0.00406667	0.00486667	0.0048	0.0054
1:3630994	0.00533333	0.004	0.0044	0.00413333	0.0042
1:3632414	0.00606666	0.00513334	0.00493333	0.00486667	0.00433333
1:3633942	0.00573333	0.00433333	0.00586667	0.0046	0.00486667
1:3637756	0.00573333	0.00466667	0.00526667	0.004	0.0046
1:3648418	0.00553333	0.0038	0.00593333	0.00446667	0.00353333
1:3652115	0.0052	0.00393333	0.00586667	0.00466667	0.004
1:3653664	0.00639999	0.0044	0.00426667	0.0046	0.00433333
1:3657071	0.00653333	0.00466667	0.00386667	0.0046	0.00526667
1:3663774	0.0054	0.00393334	0.00426666	0.005	0.0054
1:3667130	0.00573333	0.00493333	0.00513333	0.00506667	0.00406666
1:3673749	0.00653333	0.0042	0.00546667	0.0044	0.0044
1:3677396	0.00586667	0.00493333	0.00486667	0.00506667	0.00373333
1:3678323	0.00633333	0.00493333	0.00466667	0.00426667	0.0044
1:3684324	0.00566667	0.00473333	0.00553333	0.00473333	0.00506667
1:3686788	0.0056	0.00413334	0.00453333	0.00433333	0.00426667
1:3687775	0.00566667	0.00386667	0.00473333	0.00473334	0.0046
1:3688712	0.0062	0.00413333	0.0058	0.00386666	0.0052
1:3689881	0.0062	0.00393333	0.0044	0.0038	0.0046
1:3690951	0.00706666	0.00526667	0.0048	0.00473333	0.00493333
1:3691931	0.00473334	0.00526667	0.00493333	0.00466667	0.0036
1:3692978	0.00526667	0.0048	0.00466667	0.0042	0.00373333
1:3694023	0.00626667	0.0044	0.005	0.0044	0.00446667
1:3696317	0.00613333	0.00366667	0.00566667	0.004	0.00446667
1:3696982	0.0066	0.0044	0.00533333	0.0052	0.00426667
1:3698619	0.0056	0.00406667	0.00486667	0.0036	0.00413333
1:3701702	0.0062	0.00413333	0.00526667	0.0042	0.00553333
1:3704712	0.00586666	0.00433333	0.0066	0.00493333	0.0038
1:3706062	0.00606667	0.0044	0.00486667	0.0046	0.005
1:3712478	0.00646667	0.00393333	0.00553333	0.00493333	0.00393333
1:3713849	0.00613333	0.00506667	0.00466667	0.00413333	0.00366667
1:3716490	0.005	0.00413333	0.00573333	0.00433334	0.00473333
1:3717415	0.00653333	0.0042	0.00446667	0.00506667	0.00393333
1:3718949	0.00653333	0.00406667	0.00513334	0.00433333	0.00513333
1:3720622	0.0056	0.004	0.00486667	0.00406667	0.0044
1:3722253	0.0058	0.00446667	0.0058	0.00413333	0.00366667
1:3723615	0.00673333	0.0046	0.00526667	0.00433333	0.00386667
1:3725323	0.00586667	0.00573333	0.0054	0.00313333	0.00286666
1:3726575	0.00666667	0.00466667	0.00586667	0.00413333	0.0044
1:3730527	0.0054	0.0044	0.0054	0.00493333	0.0052
1:3734571	0.00526667	0.0042	0.005	0.005	0.00433333
1:3739996	0.0068	0.00393333	0.0052	0.00413333	0.0032
1:3744051	0.006	0.00433333	0.00526667	0.00506667	0.00406667
1:3748918	0.0046	0.00486667	0.00586667	0.00406667	0.0034
1:3752033	0.0066	0.00513333	0.00473334	0.0032	0.00433333
1:3755154	0.00626667	0.0052	0.00593333	0.00426667	0.00466667
1:3758413	0.00626666	0.00446667	0.0042	0.0048	0.00493333
1:3762243	0.00686666	0.0046	0.0048	0.00466667	0.0042
1:3766172	0.0058	0.004	0.00546667	0.00493333	0.00446667
1:3771685	0.0066	0.0048	0.00426667	0.0054	0.0046
1:3776228	0.00526667	0.0042	0.0046	0.00453333	0.00506667
1:3779142	0.005	0.00393333	0.00606666	0.00506667	0.00306667
1:3784187	0.00613333	0.0036	0.0044	0.00473333	0.0044
1:3790017	0.00686667	0.00446667	0.00613333	0.00506667	0.00493333
1:3799790	0.0056	0.0034	0.00486667	0.00426667	0.0052
1:3804861	0.00586667	0.00366666	0.00433333	0.0048	0.00466667
1:3808548	0.00686666	0.004	0.00506667	0.00433333	0.0044
1:3815292	0.00493333	0.00486667	0.00533333	0.0042	0.00373333
1:3819602	0.00546667	0.0038	0.00473334	0.004	0.00366667
1:3823705	0.0064	0.0046	0.00546667	0.00493333	0.00426667
1:3826765	0.00506667	0.0034	0.0046	0.0042	0.00386666
1:3827829	0.00466667	0.0038	0.00526667	0.005	0.006
1:3832143	0.00713333	0.0048	0.00406667	0.00493333	0.00486667
1:3840517	0.0056	0.00393333	0.0052	0.00446667	0.004
1:3848423	0.006	0.00453334	0.00466667	0.0046	0.00493333
1:3849812	0.0058	0.0042	0.00493333	0.00446667	0.00533333
1:3859505	0.00626667	0.00426667	0.00486666	0.0042	0.00373333
1:3861516	0.00633334	0.00386667	0.00373333	0.00513333	0.00506667
1:3863214	0.006	0.0042	0.005	0.00426667	0.0046
1:3868297	0.0062	0.00446667	0.0044	0.00406667	0.00486667
1:3874916	0.0064	0.00453333	0.00526667	0.00453333	0.0044
1:3879170	0.00653333	0.004	0.00566667	0.0046	0.0052
1:3888198	0.0056	0.00473334	0.00446667	0.00513334	0.0044
1:3892013	0.00533333	0.00473333	0.0054	0.00506667	0.00393333
1:3895421	0.00706667	0.0044	0.00526667	0.00433333	0.00373333
1:3899292	0.00533333	0.00573333	0.00493333	0.00393333	0.00453333
1:3899868	0.00526667	0.00466667	0.00453333	0.0044	0.00486667
1:3908027	0.00593333	0.00466667	0.005	0.00406667	0.0048
1:3909430	0.00780001	0.00453333	0.005	0.00426667	0.0044
1:3913892	0.00606667	0.00513333	0.00600001	0.00373333	0.0056
1:3917893	0.00453333	0.00393333	0.0048	0.00353333	0.00533333
1:3921173	0.00553333	0.00373333	0.0048	0.0044	0.00426667
1:3922657	0.00513333	0.0054	0.00486667	0.00446667	0.00393333
1:3926636	0.00546667	0.00406667	0.0062	0.004	0.00546667
1:3938804	0.00446667	0.00446667	0.00513334	0.00473333	0.0056
1:3940756	0.00533334	0.0048	0.00486667	0.00433333	0.00506666
1:3942783	0.00693334	0.0046	0.00486667	0.00446667	0.0042
1:3950604	0.00566667	0.0046	0.00613333	0.0048	0.0054
1:3973178	0.0064	0.00513333	0.00553333	0.0062	0.0044
1:3977122	0.00666666	0.00413333	0.00633333	0.0044	0.00446666
1:3981321	0.00493333	0.00386667	0.00473333	0.005	0.00453334
1:3984731	0.005	0.0044	0.00506667	0.00366667	0.00393333
1:3989772	0.00586667	0.00473333	0.0048	0.00473333	0.00486667
1:3998532	0.005	0.00466666	0.0048	0.005	0.00506667
1:4000208	0.00566667	0.0046	0.0058	0.00353333	0.00413334
1:4004958	0.00593333	0.00513333	0.00526667	0.00386667	0.0038
1:4016964	0.0062	0.0044	0.00513333	0.0036	0.0044
1:4021054	0.0068	0.00393333	0.00593333	0.0052	0.0038
1:4024682	0.00526667	0.003	0.00466667	0.00413334	0.00373333
1:4027625	0.00546667	0.0038	0.00553333	0.00366667	0.0042
1:4032259	0.00693333	0.00446667	0.00533333	0.0042	0.00533333
1:4033099	0.0058	0.00473333	0.00626667	0.005	0.00493333
1:4038264	0.00533333	0.00433333	0.00466667	0.00493333	0.0046
1:4041926	0.00486667	0.00466667	0.00626667	0.005	0.004
1:4043063	0.00640001	0.00413333	0.00453333	0.00486667	0.0046
1:4044584	0.00533333	0.00466667	0.00486667	0.00466667	0.0042
1:4045338	0.0056	0.00493333	0.00473333	0.00446667	0.0042
1:4047048	0.00546667	0.00393333	0.00486667	0.0052	0.00413334
1:4052172	0.00553333	0.00473333	0.0044	0.00606667	0.00573333
1:4058825	0.00553333	0.00533333	0.00473333	0.0042	0.00493333
1:4070299	0.0054	0.0038	0.0054	0.00453333	0.00433334
1:4071246	0.00646667	0.00386667	0.00446667	0.00433333	0.00453333
1:4073288	0.005	0.0042	0.00566667	0.00513333	0.00453333
1:4075299	0.00573333	0.0038	0.0048	0.0054	0.0046
1:4081869	0.00613333	0.00546666	0.00666666	0.00413333	0.0038
1:4085777	0.0056	0.0046	0.005	0.00433333	0.00433333
1:4086403	0.00653333	0.00326667	0.00466667	0.00386667	0.00533333
1:4087848	0.00473333	0.00506667	0.0044	0.00453334	0.00466667
1:4091992	0.00633333	0.00426667	0.00553333	0.00466667	0.005
1:4097301	0.005	0.00466666	0.00506667	0.00406667	0.006
1:4098276	0.0056	0.00493333	0.00433333	0.00526666	0.0046
1:4099115	0.00606667	0.0044	0.00446667	0.00453333	0.0042
1:4101328	0.00533333	0.00446667	0.0046	0.00426667	0.0056
1:4102407	0.00586667	0.0054	0.00533333	0.0054	0.00493333
1:4104528	0.00533333	0.00386667	0.0046	0.0046	0.00446667
1:4105215	0.00506667	0.00413333	0.00546667	0.00446667	0.0048
1:4109520	0.00546667	0.00453333	0.00526667	0.00393333	0.00493333
1:4110327	0.00553333	0.00346667	0.00646666	0.00413333	0.0046
1:4113357	0.0054	0.00366667	0.00526667	0.0038	0.004
1:4114767	0.0056	0.00453333	0.00526667	0.00486667	0.0038
1:4116272	0.00533333	0.00426666	0.00453333	0.0044	0.0036
1:4117406	0.00686666	0.00453333	0.00493333	0.00466667	0.00446667
1:4121215	0.00566667	0.00426667	0.00513333	0.00493333	0.0042
1:4127064	0.00566666	0.0042	0.00573333	0.005	0.00426667
1:4130636	0.00666666	0.00406667	0.00493333	0.00486667	0.00473333
1:4137127	0.00639999	0.00413333	0.005	0.00506667	0.00426667
1:4138025	0.00506667	0.00446667	0.0048	0.0036	0.00513333
1:4138631	0.00633333	0.00493333	0.00506667	0.0042	0.00386667
1:4142326	0.00586667	0.00453333	0.00486667	0.0048	0.00486667
1:4144338	0.00646667	0.00473333	0.0042	0.00526666	0.0056
1:4150942	0.0052	0.0042	0.00526667	0.0038	0.0042
1:4153937	0.00646667	0.0034	0.00546667	0.0046	0.005
1:4154927	0.0068	0.00433333	0.00433333	0.00366667	0.00453333
1:4155630	0.00486667	0.0052	0.00493333	0.00453333	0.00393333
1:4156258	0.00619999	0.0036	0.00533333	0.00446667	0.005
1:4157274	0.00653334	0.00466667	0.00453333	0.00386667	0.0044
1:4158568	0.00606667	0.00386667	0.00473333	0.00433333	0.0036
1:4161579	0.00733333	0.0038	0.00466667	0.00453333	0.0042
1:4162383	0.00513333	0.0044	0.00533333	0.00346667	0.00346667
1:4164411	0.00533333	0.00473333	0.00586667	0.0048	0.005
1:4166325	0.0062	0.0038	0.00406667	0.00413333	0.0042
1:4168130	0.0054	0.00446667	0.00453333	0.004	0.00433333
1:4168933	0.00666667	0.0046	0.00586667	0.00586667	0.00386667
1:4169855	0.00533333	0.00366667	0.0054	0.0048	0.0042
1:4175392	0.00573333	0.00386667	0.00533333	0.00293333	0.0038
1:4181558	0.0058	0.0056	0.00593333	0.0038	0.00473333
1:4199378	0.00466667	0.00426667	0.00453333	0.00393333	0.00406667
1:4201521	0.00473333	0.0044	0.00553333	0.00506667	0.00453333
1:4202221	0.00586666	0.00493333	0.00566667	0.00546667	0.00473333
1:4204146	0.00573334	0.00413333	0.00526667	0.00446667	0.00506667
1:4209559	0.00706668	0.0032	0.00526667	0.00453333	0.00386667
1:4210188	0.00593333	0.00486667	0.00506667	0.00373333	0.00466667
1:4213005	0.00573333	0.0038	0.0058	0.0044	0.00306667
1:4215889	0.00633333	0.00506667	0.00546667	0.00426667	0.00526667
1:4219279	0.00613333	0.00293333	0.00466667	0.0044	0.00433333
1:4220501	0.00566667	0.00353333	0.005	0.00466667	0.00406667
1:4224302	0.00573334	0.00446667	0.00513333	0.0048	0.0044
1:4226959	0.00526667	0.00446667	0.0046	0.0048	0.0042
1:4229755	0.0054	0.0044	0.00533333	0.00393333	0.0038
1:4232698	0.00546667	0.00533334	0.00513333	0.00366667	0.00433334
1:4238490	0.00453333	0.00486667	0.00573333	0.004	0.00426667
1:4238943	0.0068	0.00453333	0.00426667	0.00493333	0.00413333
1:4239676	0.00553333	0.00433334	0.0044	0.00366667	0.0046
1:4253950	0.00653333	0.00586667	0.00466666	0.0042	0.0044
1:4254712	0.00686666	0.0036	0.00493333	0.00446667	0.0034
1:4255398	0.0056	0.00406667	0.00413333	0.0044	0.0046
1:4257670	0.00546667	0.00493333	0.00626667	0.00446667	0.00413333
1:4261708	0.00626667	0.00433334	0.00533333	0.0044	0.0046
1:4264437	0.0056	0.0044	0.00473333	0.00553333	0.00353333
1:4267089	0.00566667	0.00426667	0.00486667	0.0044	0.00526666
1:4273151	0.00533333	0.0048	0.00666667	0.00526667	0.00453333
1:4276065	0.00586667	0.00446667	0.0062	0.00526667	0.00426667
1:4280435	0.00573333	0.0032	0.00466667	0.005	0.00453333
1:4282948	0.00526666	0.0042	0.00493333	0.0044	0.00406667
1:4285629	0.00653334	0.005	0.00486667	0.00473333	0.00413333
1:4286108	0.00573333	0.0044	0.00453334	0.0036	0.00413333
1:4287117	0.00653334	0.00493333	0.00526667	0.00446667	0.00373333
1:4289010	0.005	0.0042	0.00486667	0.00453334	0.00453333
1:4290594	0.00566667	0.0038	0.00526667	0.00473333	0.00513333
1:4292170	0.00613333	0.0044	0.0054	0.0038	0.00413333
1:4293047	0.00553333	0.0038	0.00653333	0.00446667	0.00533333
1:4293993	0.0062	0.00473333	0.0044	0.0046	0.00426667
1:4294917	0.00606667	0.00473333	0.00546667	0.00513333	0.00446667
1:4295461	0.00573333	0.00373333	0.00533333	0.00433333	0.0044
1:4296028	0.00586667	0.00426667	0.00486667	0.00453333	0.00426667
1:4296744	0.00486667	0.00386667	0.00426667	0.00393333	0.0052
1:4297434	0.00573333	0.00446667	0.00513333	0.00393333	0.00386667
1:4298084	0.0054	0.0038	0.00506667	0.00493333	0.00413333
1:4298693	0.00686667	0.00486667	0.00466667	0.0046	0.004
1:4299608	0.00473334	0.00473333	0.00506667	0.00453333	0.00366667
1:4300383	0.0056	0.00433333	0.0056	0.0034	0.004
1:4300875	0.00586667	0.00533333	0.00506667	0.00406667	0.00473333
1:4301373	0.00506667	0.00426667	0.0048	0.005	0.00373333
1:4301857	0.00453333	0.004	0.0054	0.0044	0.0042
1:4302315	0.0064	0.00473333	0.00433333	0.00413333	0.0044
1:4302798	0.00713333	0.00406667	0.00473333	0.0054	0.005
1:4303901	0.00673333	0.00466667	0.0064	0.0046	0.00393333
1:4307054	0.0042	0.00453334	0.00393333	0.0048	0.00413334
1:4307896	0.00566667	0.0046	0.00526667	0.00406667	0.0048
1:4308612	0.0066	0.00493333	0.0046	0.00513333	0.005
1:4309205	0.00566667	0.0038	0.00593333	0.00453333	0.0038
1:4310012	0.0054	0.00526667	0.00493334	0.00386667	0.00386667
1:4311932	0.00593333	0.00406667	0.0056	0.0046	0.0038
1:4312670	0.00406667	0.0046	0.00513333	0.00426667	0.00446667
1:4313345	0.00486667	0.00453333	0.0048	0.005	0.00466667
1:4314801	0.0054	0.00366667	0.00553333	0.00326667	0.00506667
1:4317963	0.0054	0.00426667	0.0044	0.00506667	0.0042
1:4318690	0.00593333	0.00553333	0.0058	0.00506667	0.00353333
1:4320962	0.00513333	0.0042	0.00433334	0.005	0.0046
1:4322003	0.00713334	0.00446667	0.0046	0.00473333	0.00466667
1:4323165	0.00586667	0.00473333	0.00553333	0.00386667	0.00353334
1:4328277	0.00553333	0.0042	0.00393333	0.00473333	0.00366667
1:4331171	0.006	0.00333333	0.00473333	0.0036	0.00353333
1:4334263	0.00613333	0.00506667	0.00466667	0.00493333	0.00386667
1:4335252	0.00426667	0.005	0.0046	0.00453333	0.00513333
1:4336240	0.0058	0.0046	0.00506667	0.00406667	0.0042
1:4337416	0.00493333	0.00453333	0.00586667	0.00393333	0.0046
1:4342181	0.0064	0.0042	0.00506667	0.00366667	0.00473333
1:4344514	0.00573333	0.00453333	0.0056	0.00473333	0.005
1:4347432	0.0062	0.00426666	0.00553334	0.0054	0.00486667
1:4350915	0.00633333	0.0026	0.005	0.0042	0.00353333
1:4354482	0.00573334	0.00413333	0.00613333	0.00426667	0.00446667
1:4356081	0.0058	0.00506667	0.0048	0.0048	0.00406667
1:4359984	0.0058	0.00446667	0.00446667	0.00413333	0.0046
1:4360633	0.00633333	0.00473333	0.00453333	0.00413333	0.004
1:4361559	0.0058	0.004	0.0048	0.00453333	0.0034
1:4370523	0.0056	0.00446667	0.0056	0.0032	0.00433333
1:4373367	0.00486667	0.00406667	0.00473333	0.0044	0.00453333
1:4374771	0.00466667	0.00573333	0.00486667	0.00433333	0.0048
1:4376698	0.0062	0.00406667	0.00513333	0.00586667	0.0052
1:4379083	0.00546667	0.00513333	0.0058	0.00493333	0.00526667
1:4382887	0.00546667	0.00493333	0.00446666	0.00386667	0.00446667
1:4387045	0.00706666	0.00493333	0.005	0.00486667	0.0036
1:4392959	0.0054	0.00346667	0.00473333	0.00353333	0.00406667
1:4394936	0.00713334	0.0038	0.00433333	0.00426666	0.0052
1:4398325	0.0062	0.00493333	0.00506667	0.0044	0.00526667
1:4402456	0.00546667	0.0052	0.00513333	0.005	0.00473333
1:4404825	0.00613333	0.00366667	0.0058	0.00486667	0.005
1:4407154	0.00553333	0.00393333	0.00626667	0.00426667	0.00466667
1:4418006	0.00606667	0.0038	0.005	0.0036	0.00393333
1:4421750	0.006	0.00426667	0.00546667	0.00446667	0.00393333
1:4429192	0.00613333	0.00486667	0.0052	0.00393333	0.0044
1:4434078	0.00746667	0.0042	0.00526667	0.004	0.0042
1:4439416	0.00706666	0.0046	0.0048	0.00353333	0.00486667
1:4445136	0.00633333	0.00373333	0.00493333	0.00353333	0.00413333
1:4454921	0.0066	0.0036	0.00586667	0.00426667	0.00346667
1:4458855	0.0062	0.00413333	0.00473333	0.0038	0.00366667
1:4463113	0.00706667	0.00333333	0.00506667	0.00553333	0.0044
1:4468054	0.00626667	0.00393333	0.00486667	0.0046	0.00486667
1:4473638	0.00666667	0.00386667	0.0054	0.00493333	0.0052
1:4475334	0.00546667	0.00353333	0.00533333	0.00433333	0.00506667
1:4476018	0.0054	0.0046	0.0056	0.00506667	0.004
1:4483367	0.00566667	0.00406667	0.00573333	0.0036	0.00493333
1:4484584	0.00493333	0.0044	0.00486667	0.00393333	0.00426667
1:4486141	0.00533333	0.00526667	0.00586667	0.00393333	0.00386667
1:4487030	0.00613333	0.00513333	0.0046	0.00373334	0.00446667
1:4491418	0.0056	0.00406667	0.00553333	0.00386667	0.00453334
1:4494007	0.00553333	0.0048	0.0038	0.00473333	0.00526667
1:4494977	0.00633333	0.00446667	0.00653333	0.00506667	0.00466667
1:4495955	0.00626666	0.00413333	0.00533333	0.00426667	0.00546667
1:4496851	0.00626667	0.00333334	0.00493333	0.00466667	0.00433333
1:4498073	0.00626667	0.00486666	0.00613333	0.00453333	0.0042
1:4499092	0.0052	0.00526666	0.00446667	0.00433333	0.0048
1:4500412	0.00599999	0.0054	0.00493333	0.00366667	0.00393334
1:4504170	0.0056	0.00386667	0.00566667	0.004	0.0048
1:4507685	0.00666667	0.0042	0.00613333	0.00606666	0.0042
1:4508942	0.0062	0.00506667	0.0056	0.00453333	0.00486667
1:4509506	0.0062	0.00526667	0.00653333	0.0042	0.00566667
1:4514658	0.00586667	0.00453333	0.0052	0.00413333	0.00453333
1:4521148	0.00546667	0.00406667	0.0052	0.00513333	0.005
1:4525112	0.00506667	0.00446667	0.00406667	0.00353333	0.00366667
1:4526450	0.00606667	0.0042	0.00446667	0.00466667	0.00386667
1:4529022	0.00493333	0.00406667	0.0058	0.0042	0.00553333
1:4531463	0.00593333	0.005	0.0054	0.00533333	0.0048
1:4533864	0.00673333	0.006	0.00446667	0.00493333	0.00406667
1:4536923	0.00586666	0.005	0.0054	0.0036	0.00513333
1:4542229	0.00626667	0.0056	0.00506667	0.00413333	0.0042
1:4552065	0.00693334	0.0046	0.00466667	0.0044	0.00513333
1:4562867	0.00573333	0.00493333	0.00606667	0.00393333	0.0044
1:4563681	0.00653333	0.00433333	0.0058	0.00446667	0.00453333
1:4565039	0.00626667	0.00466667	0.00526667	0.0052	0.004
1:4566765	0.0058	0.0042	0.0058	0.00353333	0.0042
1:4567490	0.00573333	0.00426667	0.00526667	0.0042	0.00413333
1:4569583	0.00666667	0.0046	0.0058	0.00386667	0.00466667
1:4570676	0.00626667	0.00466666	0.0048	0.00366667	0.004
1:4571717	0.00466667	0.0044	0.00533333	0.0048	0.00506667
1:4572259	0.00573333	0.00466667	0.00486667	0.00426667	0.00406667
1:4574474	0.0062	0.00446667	0.0044	0.00466667	0.00373333
1:4574516	0.00573333	0.0046	0.00473333	0.00373333	0.00426667
1:4575630	0.00633333	0.00366667	0.0052	0.00406667	0.00546667
1:4577033	0.00553334	0.00446667	0.00573333	0.00426667	0.0044
1:4579470	0.00546667	0.00446667	0.00466667	0.00506667	0.00413333
1:4582189	0.00613333	0.00433333	0.00573333	0.00446667	0.0044
1:4582801	0.00706667	0.0052	0.00433333	0.00466667	0.00426667
1:4583398	0.00553334	0.00473333	0.0058	0.00633333	0.0044
1:4584093	0.005	0.004	0.0048	0.00413333	0.00433333
1:4587129	0.00566667	0.00466667	0.0054	0.0042	0.0044
1:4589712	0.00593333	0.00386667	0.0046	0.0044	0.0044
1:4593558	0.00466667	0.004	0.00473333	0.00526667	0.00486667
1:4594726	0.00526667	0.0048	0.00513333	0.004	0.00453333
1:4598809	0.00586667	0.0046	0.0062	0.00406666	0.00366666
1:4606890	0.006	0.00406667	0.00446667	0.0044	0.00373333
1:4611232	0.0056	0.005	0.00506667	0.00493333	0.0044
1:4615149	0.00566667	0.00486667	0.00526667	0.00373333	0.00466667
1:4621369	0.00633333	0.005	0.00433333	0.00433333	0.005
1:4624439	0.0058	0.00453333	0.00513333	0.0048	0.00586667
1:4625900	0.006	0.0054	0.00466666	0.0042	0.00393333
1:4630026	0.0046	0.00493333	0.005	0.00506667	0.004
1:4632013	0.0052	0.0046	0.00586667	0.00493333	0.0046
1:4642199	0.00566667	0.0036	0.0062	0.0044	0.00453333
1:4647633	0.00486667	0.00426667	0.00526667	0.0042	0.00406667
1:4657370	0.00673333	0.0038	0.00533333	0.0044	0.00493333
1:4658505	0.00606667	0.00426667	0.00526667	0.0036	0.0044
1:4665835	0.00613333	0.00486667	0.0056	0.00393333	0.00393333
1:4674574	0.00666667	0.004	0.0046	0.00406667	0.00493333
1:4675730	0.00673333	0.0048	0.00493333	0.00426667	0.00353333
1:4676468	0.00506667	0.00333333	0.005	0.00353333	0.0044
1:4678184	0.00613333	0.00446667	0.00546667	0.00473333	0.0054
1:4680873	0.00513334	0.0046	0.00513333	0.0048	0.00426667
1:4684546	0.0058	0.0042	0.00486667	0.00513333	0.0042
1:4686307	0.0056	0.00426667	0.00586667	0.00526667	0.0046
1:4687926	0.00513333	0.0038	0.0056	0.0038	0.0042
1:4697689	0.00593333	0.00453333	0.00546667	0.0052	0.0042
1:4709876	0.00553333	0.00413333	0.00493333	0.00466666	0.00453333
1:4711312	0.00613333	0.004	0.0052	0.00473334	0.005
1:4712336	0.00546666	0.00453333	0.00566667	0.0046	0.00546667
1:4713375	0.00673333	0.00426667	0.00553333	0.0046	0.00526667
1:4714664	0.0056	0.0044	0.00493333	0.0056	0.00446667
1:4716471	0.00546667	0.00513333	0.00486667	0.00293333	0.00406667
1:4718286	0.00699999	0.00446667	0.00446667	0.00486667	0.00406667
1:4724967	0.00566667	0.00373333	0.00566667	0.00466667	0.00546667
1:4726370	0.0062	0.0044	0.0058	0.00393333	0.00386667
1:4727432	0.00526667	0.0044	0.00506667	0.00446667	0.0042
1:4728518	0.00513333	0.004	0.00506667	0.00473333	0.0034
1:4729108	0.00633334	0.00466667	0.00433333	0.0052	0.00426667
1:4729973	0.0056	0.0044	0.0042	0.0046	0.00526667
1:4731039	0.00653333	0.00493333	0.00546667	0.00386667	0.00426667
1:4731648	0.00653333	0.00473333	0.00526667	0.00506667	0.00433333
1:4734157	0.00633334	0.0044	0.00473333	0.00506667	0.0046
1:4737485	0.00546667	0.00493334	0.0054	0.00493333	0.00526667
1:4739309	0.00453333	0.00486667	0.0052	0.00506667	0.00493333
1:4739921	0.00753333	0.00386667	0.0056	0.00393333	0.0042
1:4740532	0.00606667	0.00473333	0.00526667	0.0042	0.00373333
1:4743473	0.00553333	0.00473333	0.0048	0.00426667	0.0042
1:4744256	0.00613333	0.0052	0.00493333	0.0038	0.00486666
1:4746481	0.00546667	0.0046	0.00513333	0.00466667	0.00446667
1:4747381	0.00566667	0.00326666	0.00506667	0.00446667	0.004
1:4750461	0.00526667	0.00413333	0.0052	0.00406667	0.00446667
1:4752971	0.00673333	0.00473333	0.00473333	0.00426667	0.00393333
1:4753572	0.0068	0.00506667	0.00513333	0.00506667	0.00446667
1:4756099	0.00686667	0.00486667	0.00473333	0.00473333	0.0044
1:4757967	0.00646667	0.0048	0.00606667	0.0046	0.00486667
1:4758574	0.00553334	0.00366667	0.00486667	0.0034	0.00393333
1:4760410	0.00626667	0.00426666	0.00426667	0.0042	0.00426667
1:4766586	0.00573333	0.00453333	0.0054	0.00406667	0.00413333
1:4768264	0.0054	0.00413333	0.004	0.00406667	0.004
1:4772655	0.00646667	0.0044	0.00633333	0.0054	0.00573333
1:4777673	0.00639999	0.00433333	0.00506667	0.00466667	0.0038
1:4781618	0.00713332	0.00426666	0.00526667	0.005	0.00486667
1:4785724	0.0058	0.00446667	0.0042	0.00473333	0.0038
1:4789651	0.0064	0.00566667	0.00486667	0.0038	0.00373333
1:4795334	0.00606667	0.00466667	0.00626667	0.00446667	0.00406667
1:4800132	0.00566667	0.00413333	0.0054	0.00473333	0.00473333
1:4803762	0.00613334	0.0038	0.005	0.0042	0.00386667
1:4808918	0.00513333	0.00453333	0.00526667	0.00466667	0.00486667
1:4821451	0.00613334	0.0042	0.00533333	0.0044	0.00413333
1:4824429	0.0062	0.0052	0.00593333	0.00453333	0.00313333
1:4827397	0.00586667	0.00453333	0.00553333	0.00513333	0.00446667
1:4830120	0.00573333	0.00513333	0.00426667	0.00366667	0.00433333
1:4856702	0.00533333	0.0046	0.00453333	0.0048	0.004
1:4882775	0.00493333	0.00593333	0.006	0.00466667	0.0046
1:4888776	0.00573333	0.00406667	0.00486667	0.00426667	0.00473333
1:4890114	0.00566667	0.0046	0.00473333	0.00466667	0.00433333
1:4919721	0.0058	0.00493333	0.00446667	0.00453333	0.00293333
1:4927293	0.00613333	0.00406667	0.0054	0.00426667	0.004
1:4945936	0.00606666	0.00386667	0.004	0.0042	0.00373333
1:4965856	0.0066	0.00386667	0.00446667	0.00546667	0.0052
1:4973367	0.00573333	0.00406667	0.00573333	0.00393333	0.00386667
1:4982601	0.00626667	0.004	0.0042	0.00386667	0.00446667
1:4983856	0.0048	0.0044	0.0056	0.00453333	0.0054
1:4986559	0.00606667	0.00386667	0.0048	0.00426667	0.0042
1:4988512	0.0054	0.00353333	0.00433333	0.00373333	0.00466667
1:4991120	0.006	0.00426667	0.0054	0.0034	0.00473333
1:4991864	0.00626667	0.00393333	0.00506666	0.004	0.0044
1:4995873	0.00566667	0.00486667	0.004	0.0052	0.00453333
1:4996526	0.00646667	0.00433333	0.00633333	0.00413333	0.0038
1:5012080	0.00646666	0.004	0.00513333	0.00426667	0.00466667
1:5015886	0.00679999	0.00386666	0.00566667	0.00433334	0.00413333
1:5020536	0.00646667	0.00486667	0.00586667	0.00386667	0.005
1:5030914	0.00633334	0.00486667	0.00406667	0.0046	0.0046
1:5037720	0.00653333	0.0042	0.00493333	0.0048	0.00386667
1:5041803	0.00593333	0.00433333	0.005	0.0042	0.005
1:5044963	0.0058	0.00386667	0.00446667	0.0046	0.00426667
1:5053471	0.00626666	0.0044	0.00466667	0.00413333	0.0038
1:5055574	0.0062	0.00446667	0.00446667	0.0052	0.00426667
1:5057978	0.0046	0.00506667	0.00566667	0.0046	0.00426667
1:5058523	0.0058	0.00466667	0.00486667	0.00426667	0.00493333
1:5060063	0.0052	0.00486667	0.00646667	0.00593334	0.00426667
1:5062519	0.00553333	0.00493333	0.00526667	0.00453333	0.00346667
1:5064065	0.00733334	0.00453333	0.00473333	0.00493333	0.00426667
1:5066737	0.00493333	0.00446667	0.00566667	0.0044	0.0044
1:5067883	0.00586667	0.0044	0.0046	0.00366667	0.00506667
1:5068852	0.00633333	0.00433333	0.00506667	0.00426667	0.0046
1:5070152	0.00646667	0.0042	0.00473333	0.00466667	0.00446667
1:5071623	0.00566667	0.00473333	0.00566666	0.00433333	0.00426667
1:5078015	0.00493333	0.00526667	0.00553334	0.0054	0.0042
1:5079463	0.00673333	0.00373333	0.00426667	0.0038	0.00446667
1:5080477	0.00486667	0.00466667	0.00413333	0.00313333	0.00433333
1:5083062	0.00726667	0.0056	0.0052	0.00446667	0.00473333
1:5086434	0.00533333	0.0044	0.0042	0.00473333	0.0034
1:5092091	0.00653333	0.00506667	0.0038	0.005	0.0038
1:5093642	0.00666666	0.00426667	0.00513333	0.00393333	0.00393333
1:5099108	0.006	0.0046	0.0048	0.00453333	0.0042
1:5122480	0.00586667	0.00433333	0.00513333	0.00473333	0.00473333
1:5128098	0.00646667	0.00433333	0.00486667	0.00406667	0.00513334
1:5134183	0.0054	0.00466667	0.00573333	0.00546667	0.0042
1:5138433	0.00566667	0.00426667	0.0054	0.00433333	0.00526667
1:5143377	0.00593333	0.005	0.00513333	0.0038	0.00533333
1:5147933	0.00613333	0.0038	0.0056	0.0052	0.00366667
1:5155786	0.0058	0.00366667	0.00513333	0.0044	0.00393333
1:5167938	0.00613333	0.0046	0.00573333	0.00353333	0.00426667
1:5182127	0.00633333	0.00466667	0.00473333	0.0044	0.00413333
1:5186570	0.00506667	0.00473334	0.00466667	0.00513333	0.005
1:5205925	0.00693333	0.004	0.00593333	0.00366667	0.00546667
1:5211480	0.00553333	0.004	0.00626667	0.00453333	0.00446667
1:5217586	0.0054	0.0034	0.0046	0.00426667	0.00406667
1:5219539	0.00606667	0.00493333	0.0058	0.00513333	0.00406667
1:5227810	0.00486667	0.00426667	0.00553333	0.005	0.00433333
1:5228698	0.00606667	0.0044	0.006	0.0048	0.00406667
1:5229618	0.00533333	0.00473333	0.00373333	0.0056	0.0044
1:5233901	0.00633333	0.00446667	0.0056	0.00413333	0.00513333
1:5305646	0.00486667	0.00426667	0.0054	0.00406667	0.00366667
1:5308367	0.00713334	0.00506667	0.00633333	0.0052	0.00386667
1:5313729	0.00600001	0.00386667	0.0056	0.0046	0.00393333
1:5321320	0.00613334	0.0054	0.00526667	0.00513333	0.0044
1:5327486	0.00593334	0.00406667	0.0042	0.0054	0.00473333
1:5331327	0.00593334	0.00426667	0.0046	0.0038	0.00413333
1:5333979	0.00586667	0.004	0.00513333	0.00493333	0.0042
1:5338825	0.00593333	0.00493333	0.00453333	0.0048	0.00446667
1:5341164	0.0058	0.00466667	0.00606667	0.0046	0.005
1:5344578	0.00646667	0.00426667	0.0046	0.00513333	0.00433333
1:5346652	0.00620001	0.00506667	0.00533333	0.0048	0.00386667
1:5347144	0.00573333	0.00413333	0.00593333	0.00553333	0.00466667
1:5351077	0.0056	0.00466667	0.0044	0.00426667	0.00553333
1:5353832	0.00626666	0.0046	0.0054	0.0044	0.004
1:5354891	0.00646667	0.00533333	0.0052	0.0046	0.00446667
1:5356977	0.00673333	0.00366667	0.00546667	0.00513334	0.00506667
1:5357775	0.00673334	0.0044	0.0046	0.00466667	0.0046
1:5359288	0.0062	0.00486667	0.00433333	0.00433333	0.00373333
1:5364254	0.00679999	0.00353334	0.00433333	0.00466666	0.00433333
1:5365355	0.00546667	0.0048	0.006	0.0046	0.004
1:5366547	0.0056	0.00566667	0.00513333	0.00413333	0.005
1:5367332	0.00546667	0.0038	0.00506666	0.00393333	0.00373333
1:5369938	0.00553333	0.0044	0.00486667	0.00393333	0.00406667
1:5372683	0.0064	0.00326667	0.00373333	0.00486667	0.00453333
1:5377002	0.00619999	0.00466667	0.0044	0.0046	0.00473333
1:5380871	0.00573333	0.00493333	0.00493333	0.00426666	0.00386667
1:5384710	0.00513333	0.00426667	0.00506667	0.00433333	0.00486667
1:5386741	0.0068	0.0044	0.0052	0.00393333	0.0042
1:5387306	0.00580001	0.004	0.00506667	0.00466667	0.00386667
1:5390376	0.005	0.00466666	0.00446667	0.0046	0.00446667
1:5391649	0.00506667	0.0044	0.00513333	0.0052	0.00486667
1:5393855	0.00573333	0.00486667	0.00533333	0.00493333	0.004
1:5395210	0.0056	0.00506666	0.00453333	0.00553333	0.00386667
1:5396552	0.00573333	0.00453333	0.00533333	0.00526667	0.0034
1:5399035	0.006	0.00466666	0.0052	0.00406667	0.00333333
1:5442531	0.00673333	0.0056	0.006	0.0042	0.00546667
1:5445137	0.0056	0.0052	0.0052	0.00506667	0.00513333
1:5451338	0.0068	0.00466667	0.00533333	0.0044	0.00413333
1:5456530	0.00553334	0.005	0.00426667	0.00453334	0.00486667
1:5457327	0.00626667	0.004	0.0056	0.00473333	0.0036
1:5462172	0.00546667	0.0042	0.0046	0.0044	0.00493333
1:5463800	0.00546667	0.0048	0.00466667	0.0042	0.00486667
1:5467977	0.00653333	0.00453333	0.00546667	0.00426667	0.0046
1:5469628	0.00586667	0.005	0.00586667	0.0046	0.00473333
1:5470488	0.00566667	0.0042	0.00566667	0.00493333	0.0042
1:5472245	0.00606667	0.00473333	0.0056	0.00506667	0.0036
1:5474586	0.00626667	0.0044	0.00433333	0.00366667	0.00473333
1:5475277	0.00646667	0.00366667	0.00466667	0.00526667	0.00446667
1:5482005	0.00733333	0.0044	0.00506667	0.00493333	0.00373333
1:5488869	0.0066	0.00446667	0.0052	0.00486667	0.00326667
1:5490114	0.00473333	0.0038	0.00453333	0.00493333	0.00553333
1:5493732	0.00586667	0.005	0.005	0.00486667	0.0044
1:5497886	0.00553333	0.00393333	0.00573333	0.00433334	0.004
1:5500860	0.00706667	0.004	0.00446667	0.00433333	0.00433333
1:5502109	0.00673334	0.00453333	0.00453333	0.0042	0.00453333
1:5505791	0.00533333	0.00386667	0.0042	0.00466667	0.00473333
1:5506653	0.00613333	0.005	0.0046	0.0044	0.00453333
1:5507573	0.00626667	0.00433333	0.00406667	0.00513333	0.00473333
1:5508592	0.00486667	0.003	0.00526667	0.00453333	0.00473333
1:5510131	0.00633333	0.0048	0.00526667	0.00533334	0.00426667
1:5511256	0.0064	0.0046	0.00453333	0.0044	0.0048
1:5515602	0.0064	0.00566667	0.00533333	0.0048	0.0042
1:5516268	0.00633333	0.00366667	0.00513333	0.0048	0.004
1:5518548	0.0052	0.0038	0.00553333	0.00453333	0.0046
1:5519231	0.00626667	0.00446667	0.00453333	0.0042	0.0044
1:5521140	0.00593333	0.00413333	0.00513333	0.00426667	0.00513333
1:5523770	0.00720001	0.00386667	0.00533333	0.00513333	0.004
1:5524266	0.0058	0.004	0.00506667	0.00493333	0.0052
1:5525440	0.005	0.00406667	0.00413333	0.0042	0.00533333
1:5528033	0.00573333	0.005	0.00533333	0.00346666	0.00386667
1:5529169	0.0058	0.00433333	0.00473333	0.0054	0.00493333
1:5530742	0.00633333	0.0042	0.00533333	0.00453333	0.00533333
1:5531792	0.00533333	0.0034	0.00553333	0.00386667	0.00346667
1:5532831	0.00606667	0.00433333	0.0044	0.0048	0.005
1:5539390	0.0058	0.00506667	0.00453333	0.00406667	0.00393334
1:5543915	0.00453333	0.00426667	0.00493333	0.00566667	0.005
1:5546041	0.0052	0.00453333	0.004	0.00413333	0.00366667
1:5547896	0.00533333	0.00406667	0.00573333	0.00473333	0.00446667
1:5549415	0.00566667	0.00353333	0.00526667	0.0038	0.004
1:5550567	0.0062	0.0042	0.00466667	0.00413333	0.00426667
1:5551416	0.0052	0.0048	0.0052	0.0038	0.005
1:5553445	0.00513333	0.00433333	0.00553333	0.004	0.0052
1:5554629	0.00593333	0.0044	0.00526667	0.00413333	0.00466667
1:5556193	0.0056	0.004	0.00586667	0.00373333	0.00326667
1:5557216	0.00706667	0.00446667	0.00573333	0.0044	0.0044
1:5558062	0.00586667	0.00513333	0.00506667	0.00413333	0.005
1:5559215	0.00573333	0.00366667	0.0056	0.0046	0.00413333
1:5559784	0.006	0.00426666	0.0038	0.00453333	0.00473333
1:5560728	0.006	0.00413333	0.0062	0.0038	0.00446667
1:5561667	0.00553333	0.00493333	0.00486667	0.00413333	0.00446667
1:5562248	0.0066	0.0046	0.00473333	0.00386667	0.00373333
1:5564712	0.00600001	0.00393333	0.005	0.00466667	0.0034
1:5567764	0.00593333	0.004	0.00386667	0.00393333	0.00453333
1:5569070	0.00493333	0.0048	0.00446667	0.00446667	0.0036
1:5573890	0.00573333	0.0042	0.0052	0.0048	0.00533333
1:5576173	0.0052	0.00386667	0.005	0.00473333	0.00386667
1:5577706	0.00566667	0.00446667	0.00513333	0.00473333	0.0046
1:5581021	0.00533333	0.0042	0.0046	0.00473333	0.00433333
1:5583600	0.00686667	0.004	0.0056	0.00446667	0.0048
1:5586956	0.0072	0.0042	0.0052	0.00473333	0.00553333
1:5589953	0.006	0.004	0.00526667	0.00426667	0.00413333
1:5597118	0.00633333	0.0044	0.00493333	0.00353333	0.0038
1:5602413	0.007	0.00393333	0.00580001	0.0046	0.00486667
1:5605986	0.00606666	0.005	0.0052	0.0042	0.00446667
1:5608354	0.00593333	0.0042	0.00566667	0.0042	0.00386666
1:5612484	0.00533333	0.00406667	0.00433333	0.00506667	0.00393333
1:5614060	0.00566667	0.00386666	0.00506667	0.00433334	0.0046
1:5615120	0.00706666	0.00413333	0.00546667	0.00453333	0.00426667
1:5615684	0.0048	0.00326667	0.0046	0.0046	0.0044
1:5616680	0.00626666	0.0048	0.00413333	0.00433333	0.0044
1:5629126	0.00646666	0.0052	0.0046	0.0038	0.005
1:5630208	0.00593333	0.0046	0.006	0.00493333	0.0042
1:5631048	0.00566667	0.004	0.005	0.00406667	0.00426667
1:5634484	0.0064	0.0052	0.00473333	0.00573333	0.00473333
1:5638943	0.006	0.00426667	0.0046	0.005	0.006
1:5642781	0.00586667	0.00346667	0.00593333	0.005	0.00433333
1:5644654	0.0052	0.0038	0.00546667	0.00466667	0.004
1:5645238	0.00473333	0.00433333	0.00506667	0.0042	0.00513333
1:5645792	0.0064	0.004	0.00506667	0.00413333	0.0044
1:5648447	0.00513334	0.00413333	0.005	0.0036	0.0054
1:5649858	0.00546667	0.00493333	0.0062	0.00446667	0.00313333
1:5652991	0.00586667	0.00506667	0.0046	0.00513333	0.00453333
1:5654057	0.00706667	0.00466667	0.00466667	0.0038	0.0044
1:5656543	0.00566667	0.0044	0.0044	0.00466667	0.00453333
1:5657951	0.00606667	0.0034	0.00406667	0.00413333	0.0048
1:5661867	0.0058	0.0032	0.0046	0.00466667	0.00446667
1:5664141	0.00566667	0.00493333	0.00433334	0.00506667	0.0052
1:5665430	0.00586666	0.00406667	0.00506667	0.00513333	0.00446667
1:5668141	0.00633333	0.0042	0.00486667	0.00506667	0.00426666
1:5676409	0.00613333	0.00453333	0.0052	0.00453333	0.00486667
1:5681699	0.00626667	0.00433333	0.0042	0.005	0.0048
1:5690034	0.00753333	0.00353333	0.0056	0.004	0.0038
1:5691052	0.0062	0.00466667	0.0048	0.005	0.00466667
1:5691613	0.00646666	0.003	0.00426667	0.00486667	0.00393333
1:5692100	0.006	0.00493333	0.00446667	0.00453333	0.00486667
1:5696351	0.00726667	0.0036	0.00566667	0.0048	0.00413333
1:5701284	0.0046	0.00453333	0.00513333	0.0056	0.00413333
1:5709191	0.00573333	0.00333333	0.00473333	0.00513333	0.00406667
1:5710366	0.00546667	0.00513333	0.00513334	0.00453333	0.00506667
1:5714593	0.0058	0.0036	0.00493333	0.00473333	0.0044
1:5716523	0.00526667	0.00406666	0.0044	0.0044	0.0044
1:5725567	0.0056	0.00413333	0.00546667	0.00433333	0.00386667
1:5726481	0.00586666	0.00473333	0.005	0.0038	0.0044
1:5730545	0.006	0.00446667	0.00526666	0.00526667	0.00413333
1:5738393	0.00493333	0.00486667	0.00546667	0.00473333	0.00546667
1:5743277	0.00546667	0.00446667	0.0042	0.00433333	0.00453333
1:5744744	0.00606667	0.0056	0.00506667	0.00413333	0.00433333
1:5745330	0.0056	0.00526667	0.00526667	0.00486667	0.00426667
1:5746865	0.00526667	0.00406667	0.0052	0.00393333	0.00426667
1:5747731	0.00486667	0.00566667	0.00473333	0.0044	0.0046
1:5748704	0.0062	0.00386667	0.0046	0.00413333	0.00526667
1:5749728	0.00586667	0.00486667	0.00546667	0.00453333	0.00426667
1:5753019	0.00613333	0.005	0.00493333	0.00493333	0.00413333
1:5753664	0.00693334	0.00566667	0.00386667	0.00373333	0.00326667
1:5756115	0.00546667	0.00413333	0.0044	0.0052	0.004
1:5761166	0.00639999	0.00453333	0.004	0.0046	0.00373333
1:5764074	0.00646667	0.00526667	0.00453333	0.00373333	0.004
1:5764859	0.00586667	0.00493333	0.00526667	0.00426667	0.0034
1:5765784	0.0058	0.00473333	0.00553334	0.00473333	0.00333333
1:5766577	0.00533333	0.00453333	0.00546667	0.0044	0.00566667
1:5768796	0.00553333	0.00393333	0.0048	0.00486667	0.00453333
1:5769873	0.0052	0.0052	0.00573333	0.0046	0.00473333
1:5771311	0.00699999	0.0036	0.00486667	0.0048	0.00466667
1:5772942	0.00673333	0.00466667	0.00513333	0.00373333	0.00466667
1:5774085	0.0054	0.00433333	0.0048	0.005	0.00413333
1:5774642	0.00553333	0.0044	0.005	0.0044	0.00386667
1:5781628	0.00673334	0.00446667	0.00413333	0.00393333	0.00373333
1:5783354	0.0068	0.00513333	0.00506667	0.0044	0.0042
1:5783994	0.00526667	0.00466667	0.0048	0.0046	0.00406667
1:5785482	0.00553333	0.00353333	0.0048	0.00466667	0.00533333
1:5790263	0.0052	0.0036	0.00493333	0.00513333	0.0046
1:5791430	0.00666667	0.0036	0.0054	0.00546667	0.00453333
1:5792922	0.00553333	0.00473333	0.0054	0.00466667	0.00486667
1:5797218	0.00646667	0.00386667	0.00426667	0.00466667	0.0044
1:5803981	0.00673334	0.00473333	0.00446667	0.00426667	0.0044
1:5807646	0.006	0.00566667	0.00533333	0.00493333	0.0052
1:5812002	0.00673334	0.0038	0.00473333	0.00466667	0.00393333
1:5817838	0.00526667	0.00453334	0.0056	0.00553333	0.00413333
1:5822399	0.00693333	0.00526667	0.00446667	0.00466667	0.00506667
1:5824824	0.00493333	0.00466667	0.00493333	0.00453333	0.00406667
1:5834595	0.00573333	0.00433333	0.0052	0.00433333	0.00486667
1:5835160	0.00613333	0.0048	0.00506667	0.00426667	0.00373333
1:5837481	0.00693333	0.00466667	0.00486667	0.00473333	0.005
1:5839400	0.00593333	0.00486667	0.005	0.00526667	0.0048
1:5842456	0.00653333	0.00413333	0.00666666	0.00486666	0.0046
1:5846627	0.0056	0.0054	0.00493333	0.00493333	0.00486667
1:5860261	0.00553333	0.00393333	0.00546667	0.00413334	0.0036
1:5865844	0.00573333	0.004	0.0054	0.00413333	0.004
1:5871590	0.00606667	0.0046	0.0044	0.0038	0.00393333
1:5877579	0.00619999	0.00373333	0.00446667	0.00366667	0.0042
1:5882239	0.00646667	0.0046	0.00533333	0.004	0.00413333
1:5884629	0.00566667	0.00346667	0.0058	0.0056	0.00386667
1:5888771	0.00453333	0.00433333	0.0058	0.00446667	0.00373333
1:5892006	0.00453333	0.004	0.0052	0.00406667	0.0046
1:5892833	0.0044	0.00373334	0.00506666	0.0042	0.00586666
1:5893640	0.00693333	0.00413334	0.00553333	0.00506667	0.00493333
1:5894509	0.00673333	0.00333333	0.00453333	0.0036	0.00493333
1:5897635	0.00646667	0.00466667	0.00553333	0.00386667	0.00473333
1:5901795	0.0062	0.00466667	0.005	0.0042	0.00453333
1:5906014	0.00626667	0.00513333	0.0058	0.00526667	0.00493333
1:5909634	0.0064	0.00566667	0.00526667	0.00526667	0.00386667
1:5919373	0.00526667	0.00433333	0.00573333	0.00346667	0.00453333
1:5922932	0.0056	0.00466667	0.00566667	0.00426667	0.00486667
1:5927852	0.00566667	0.00426667	0.00473333	0.00533333	0.00413333
1:5928562	0.00593333	0.00473333	0.00533333	0.00513333	0.0048
1:5932712	0.0064	0.00353334	0.0044	0.0042	0.00426667
1:5939365	0.00666667	0.0044	0.00553333	0.00473333	0.0044
1:5945254	0.00646667	0.00373333	0.005	0.0054	0.0042
1:5946687	0.0046	0.0044	0.00526667	0.00473333	0.0052
1:5948205	0.0062	0.0046	0.0046	0.00373333	0.0042
1:5956793	0.0062	0.00546667	0.005	0.00453333	0.00306667
1:5959820	0.00546667	0.00446667	0.006	0.0054	0.00413333
1:5968632	0.00566667	0.0048	0.00513333	0.00433333	0.00413333
1:5974070	0.00633333	0.0052	0.00686667	0.00426667	0.0044
1:5979118	0.00466667	0.00486667	0.00473333	0.004	0.00453333
1:5982732	0.00606667	0.004	0.00513333	0.00406667	0.00406667
1:5983887	0.0066	0.00413333	0.0056	0.00393334	0.00393334
1:5985024	0.0054	0.0036	0.00573333	0.00586667	0.00406667
1:5986645	0.0064	0.00513333	0.005	0.00393333	0.00386667
1:5987236	0.0058	0.00373333	0.00453333	0.00413333	0.00406667
1:5988144	0.00633333	0.00406667	0.00533333	0.00426667	0.00506667
1:5988894	0.00706666	0.0054	0.006	0.00453333	0.00473333
1:5989718	0.0062	0.00393333	0.0052	0.00366667	0.00393333
1:5991427	0.00606667	0.00446667	0.00513333	0.00413333	0.00413333
1:5992841	0.00626667	0.004	0.00473333	0.00446667	0.00426667
1:5993447	0.00586667	0.0048	0.0046	0.00433333	0.0044
1:6001128	0.00726666	0.00486667	0.00493333	0.00406666	0.00426667
1:6002953	0.00633333	0.00533333	0.00553333	0.00346667	0.00446667
1:6009317	0.00646667	0.00326667	0.00486667	0.00433333	0.00446667
1:6014507	0.00680001	0.0048	0.0052	0.0036	0.0056
1:6015476	0.00626666	0.005	0.00513333	0.00406666	0.0054
1:6026812	0.00513333	0.00473333	0.00493333	0.0046	0.00493333
1:6032129	0.00659999	0.0048	0.00473333	0.0046	0.0036
1:6035291	0.00553333	0.0042	0.00473333	0.00326667	0.00553333
1:6036737	0.00573333	0.00606667	0.00546667	0.0046	0.00513333
1:6038527	0.00593333	0.00413333	0.00573333	0.00506667	0.00346667
1:6046468	0.0054	0.0044	0.00473333	0.00493333	0.004
1:6048080	0.0052	0.0042	0.00526667	0.00473333	0.00446667
1:6049970	0.006	0.0048	0.00406667	0.00406667	0.00406667
1:6052470	0.00659999	0.00373333	0.00533333	0.00506667	0.00446667
1:6054551	0.00733333	0.00506667	0.0048	0.00486667	0.00413333
1:6056604	0.00573333	0.00453333	0.00553333	0.0042	0.005
1:6061246	0.00473333	0.00446667	0.00686667	0.00406667	0.00393333
1:6062518	0.00660001	0.00446667	0.0056	0.00413333	0.0036
1:6063547	0.00653333	0.00366667	0.0058	0.00486667	0.00486667
1:6066482	0.00526667	0.00506667	0.0048	0.00486667	0.00486667
1:6069957	0.00566667	0.00433333	0.0048	0.00493333	0.00573333
1:6074208	0.00573333	0.00346667	0.00546667	0.00453333	0.00453333
1:6078184	0.00533333	0.00446667	0.00493333	0.004	0.00473333
1:6083389	0.0062	0.00493333	0.00466666	0.0042	0.0048
1:6086671	0.0066	0.0044	0.00526666	0.0044	0.0044
1:6090860	0.00753333	0.00613333	0.00546667	0.00606667	0.00413333
1:6092662	0.00453333	0.00446667	0.00513333	0.0046	0.004
1:6094219	0.00693334	0.00386667	0.0052	0.004	0.00433333
1:6096674	0.00533333	0.0048	0.00473333	0.00446667	0.00426667
1:6099059	0.00746666	0.00466667	0.00613333	0.00473333	0.0056
1:6099808	0.00653334	0.0058	0.0058	0.00533333	0.0054
1:6101732	0.00493333	0.00486667	0.0052	0.00473334	0.00393333
1:6102488	0.00586667	0.00453333	0.00433333	0.00466667	0.0038
1:6105915	0.006	0.00413333	0.0054	0.00386667	0.00453333
1:6108335	0.00733333	0.00386667	0.00406667	0.00413333	0.00513334
1:6114436	0.0046	0.00406667	0.00513333	0.0034	0.00566667
1:6117593	0.0058	0.00453333	0.006	0.00386667	0.00486667
1:6121323	0.0066	0.00526667	0.00466667	0.004	0.00453333
1:6125283	0.00533333	0.0042	0.00453333	0.00433333	0.00453333
1:6129638	0.00573333	0.00493333	0.00446667	0.00453334	0.00493333
1:6133181	0.00719999	0.0044	0.0052	0.0046	0.00453333
1:6134028	0.00646666	0.0052	0.00373333	0.00433333	0.0052
1:6135441	0.0058	0.00426667	0.00493333	0.0048	0.00513333
1:6139084	0.00546667	0.00473333	0.00526667	0.00386667	0.0048
1:6140593	0.0052	0.0046	0.00553333	0.0042	0.00373333
1:6141131	0.0056	0.00433333	0.0064	0.00433333	0.00366667
1:6148139	0.00586667	0.0056	0.00593333	0.0058	0.00406666
1:6151131	0.00733333	0.00493333	0.006	0.00526667	0.00553333
1:6154670	0.00586667	0.0044	0.0048	0.00513333	0.0052
1:6155731	0.0052	0.0052	0.00526667	0.00453333	0.00553333
1:6158046	0.0066	0.005	0.0052	0.00533333	0.0044
1:6158881	0.0058	0.00433333	0.00406667	0.00453333	0.0036
1:6159627	0.00466667	0.0046	0.005	0.00446666	0.00346667
1:6160986	0.00533333	0.00366666	0.00426667	0.00526667	0.0052
1:6168009	0.00573333	0.005	0.00386667	0.00453333	0.00413333
1:6171754	0.0056	0.00393333	0.00566667	0.00426667	0.00446666
1:6182470	0.00486667	0.00413333	0.005	0.00453333	0.00426667
1:6184195	0.00593333	0.00346666	0.00486667	0.00486667	0.0054
1:6190051	0.00526667	0.0042	0.00593333	0.00346667	0.00506666
1:6194638	0.00626667	0.00466667	0.0048	0.00353334	0.00453333
1:6201360	0.00626667	0.00533333	0.00486667	0.00453333	0.0042
1:6204658	0.00653333	0.00413333	0.00486667	0.00453333	0.0036
1:6205654	0.0058	0.004	0.005	0.00386667	0.00526667
1:6207793	0.0052	0.00473333	0.006	0.0046	0.0048
1:6208557	0.00593333	0.00373333	0.00486667	0.00473333	0.0046
1:6211327	0.0056	0.00486667	0.00426667	0.004	0.0044
1:6213780	0.0062	0.00466667	0.00586667	0.0042	0.0044
1:6214312	0.00626667	0.00406667	0.0042	0.0048	0.00386667
1:6215626	0.0058	0.00386667	0.00406667	0.00453333	0.00326667
1:6216086	0.0058	0.00373333	0.00506667	0.0042	0.00433333
1:6218619	0.00493333	0.00446667	0.0052	0.00473333	0.0054
1:6225719	0.00553333	0.00533333	0.00486667	0.00446667	0.004
1:6228098	0.00526667	0.00366667	0.00526667	0.00446667	0.004
1:6229284	0.00473333	0.00453334	0.0048	0.00413333	0.00426667
1:6229988	0.0066	0.00433333	0.0046	0.00506667	0.00473334
1:6230706	0.00633333	0.00433333	0.00506667	0.00406667	0.0044
1:6231590	0.00573333	0.00386667	0.00553333	0.00446667	0.00473333
1:6232474	0.0068	0.004	0.0058	0.00513333	0.00506667
1:6235640	0.00593333	0.0048	0.00613333	0.0054	0.0044
1:6238245	0.00546667	0.00466667	0.0046	0.00493333	0.00493333
1:6245619	0.0054	0.00386667	0.00566667	0.00526667	0.0042
1:6248142	0.00633333	0.00486667	0.00486667	0.00473333	0.00366667
1:6251669	0.00493333	0.004	0.00526667	0.00393333	0.0036
1:6261563	0.00713334	0.0044	0.005	0.00386667	0.00426667
1:6264645	0.00666666	0.0052	0.00446667	0.00606667	0.0052
1:6266941	0.00586666	0.00413333	0.00553333	0.00386667	0.00366667
1:6269762	0.0056	0.00353333	0.00426667	0.0038	0.00386667
1:6270567	0.00706667	0.00426667	0.0046	0.0044	0.00506667
1:6274384	0.00553333	0.00453333	0.005	0.0044	0.00433333
1:6276886	0.0058	0.0042	0.00553333	0.00453333	0.00546667
1:6281202	0.005	0.0048	0.00486667	0.00586666	0.004
1:6287123	0.00613333	0.00473333	0.00526667	0.00493333	0.00473333
1:6290541	0.00486667	0.00433333	0.00373333	0.00553333	0.0044
1:6293159	0.005	0.0044	0.00566667	0.00406667	0.00446667
1:6294929	0.00586667	0.0044	0.00506666	0.00493333	0.0044
1:6297587	0.00573333	0.00633333	0.00506667	0.0044	0.00546667
1:6300474	0.006	0.00326667	0.00473334	0.0056	0.0042
1:6307242	0.00526667	0.00413333	0.00433333	0.00426667	0.00413333
1:6309817	0.0054	0.00453333	0.00573333	0.00506666	0.00513333
1:6310604	0.0066	0.00426667	0.0052	0.00386667	0.00433333
1:6314003	0.00633333	0.00513333	0.0048	0.00533333	0.00453333
1:6315636	0.006	0.00486667	0.00473333	0.00453333	0.00466667
1:6316397	0.0052	0.00486667	0.00573333	0.0054	0.0038
1:6318145	0.00473333	0.00486667	0.00446667	0.00426667	0.0044
1:6322278	0.00526667	0.0042	0.00466667	0.00426667	0.0054
1:6322919	0.00506667	0.00473333	0.0058	0.00426667	0.00506667
1:6326900	0.00593333	0.00433333	0.00466667	0.0054	0.00433333
1:6328390	0.0064	0.00453333	0.00566667	0.0046	0.00473333
1:6329265	0.00606667	0.00553333	0.00566667	0.00446667	0.0056
1:6330097	0.00553333	0.0054	0.0046	0.00453333	0.005
1:6332235	0.00573333	0.00466667	0.0052	0.00433333	0.00393333
1:6334008	0.00640001	0.00533333	0.0046	0.00393333	0.00453333
1:6335484	0.00546666	0.00453333	0.00566667	0.00446667	0.00473334
1:6336034	0.0054	0.00386667	0.00566667	0.00506667	0.00473333
1:6337632	0.00506667	0.00406667	0.0042	0.00453333	0.00426667
1:6338844	0.00619999	0.0042	0.0056	0.00546667	0.00486667
1:6341631	0.00626667	0.00433333	0.00526667	0.00526667	0.00453333
1:6346345	0.00613333	0.00393333	0.00546667	0.00446667	0.00466666
1:6346999	0.00633333	0.00486667	0.00433333	0.00466667	0.00466667
1:6348797	0.00726667	0.00393333	0.00466667	0.0044	0.0032
1:6351384	0.00553333	0.00406667	0.0052	0.00466667	0.0054
1:6355340	0.00606667	0.00433333	0.00493334	0.00446667	0.00393333
1:6356373	0.00653334	0.00373333	0.00566667	0.0034	0.00486667
1:6357365	0.00466667	0.0054	0.00453333	0.0042	0.0044
1:6357962	0.00546667	0.00373334	0.005	0.0044	0.00493333
1:6359850	0.005	0.0052	0.00426667	0.00473333	0.00426667
1:6363482	0.00593333	0.005	0.00473333	0.0046	0.00493333
1:6366473	0.00506667	0.00406667	0.00506667	0.00533333	0.0048
1:6371058	0.00646667	0.00393333	0.00546667	0.0038	0.00446667
1:6375330	0.00546667	0.00486667	0.005	0.0042	0.0048
1:6378692	0.0062	0.00393333	0.00553333	0.00426667	0.00453333
1:6384709	0.00526667	0.00393333	0.00553333	0.00426667	0.00426667
1:6385376	0.00573333	0.00413333	0.00433333	0.00506667	0.00473333
1:6386544	0.00506667	0.0042	0.0058	0.00433333	0.00386667
1:6388872	0.00446667	0.0048	0.00486667	0.0052	0.00366667
1:6389756	0.00613334	0.004	0.00433333	0.00386666	0.00393333
1:6394259	0.00593333	0.00393333	0.00553333	0.0042	0.00473333
1:6395859	0.00566667	0.0048	0.00426667	0.00386667	0.00426667
1:6399397	0.00593333	0.00473333	0.0046	0.0036	0.00473333
1:6403787	0.0052	0.00406667	0.00506667	0.00473333	0.00453333
1:6404933	0.00546667	0.00513333	0.0056	0.00553333	0.00453333
1:6406191	0.00586667	0.00486667	0.0038	0.0046	0.00593333
1:6409452	0.0052	0.0046	0.00546667	0.00526667	0.0044
1:6415835	0.00533334	0.0046	0.00606667	0.00333333	0.0042
1:6419970	0.00633333	0.00486667	0.005	0.00526667	0.00453333
1:6424561	0.00593333	0.00386667	0.00546667	0.0036	0.00406667
1:6427434	0.0064	0.00466667	0.0046	0.0038	0.00426667
1:6430942	0.0056	0.0048	0.0046	0.00453333	0.0044
1:6433651	0.00633333	0.00486667	0.00473333	0.00373333	0.00346667
1:6436329	0.00720001	0.00513333	0.00473333	0.00486667	0.00473333
1:6440092	0.0058	0.0036	0.00533333	0.00413333	0.00413333
1:6440687	0.00606667	0.00426667	0.00393333	0.0044	0.0042
1:6442883	0.00606667	0.00373333	0.0054	0.0046	0.00406667
1:6443810	0.00566667	0.00453333	0.00466667	0.00413333	0.00373333
1:6446806	0.00633333	0.00446667	0.0046	0.00406667	0.0042
1:6448437	0.00573333	0.0046	0.005	0.00453333	0.0034
1:6449104	0.00506667	0.00393333	0.00493333	0.00426667	0.00393333
1:6449771	0.00646667	0.00473333	0.0042	0.00473333	0.00386667
1:6459928	0.0056	0.00473333	0.0042	0.00426667	0.0038
1:6468896	0.0052	0.00526666	0.00526666	0.00446667	0.00486667
1:6469442	0.00573333	0.0048	0.0058	0.0054	0.00453333
1:6470334	0.0054	0.00466667	0.0046	0.004	0.00513333
1:6471671	0.00526667	0.00486667	0.00366667	0.00466667	0.00413333
1:6474772	0.00633333	0.00473333	0.00686666	0.00433333	0.004
1:6482306	0.00513333	0.00373333	0.00493333	0.0052	0.004
1:6483177	0.00566667	0.00413333	0.005	0.00493333	0.00466667
1:6485935	0.00473333	0.00493333	0.00426667	0.00406667	0.00546667
1:6491695	0.00513333	0.004	0.00506667	0.00433333	0.00406667
1:6494875	0.00633333	0.00386667	0.00453333	0.00346667	0.00413333
1:6498668	0.00546667	0.00466667	0.0058	0.0044	0.00486667
1:6500949	0.00473333	0.00533333	0.00573333	0.00506667	0.0038
1:6503750	0.00506667	0.00393333	0.0058	0.0052	0.00446667
1:6506339	0.00546667	0.004	0.00466667	0.00413333	0.00433333
1:6511942	0.00566667	0.00366667	0.0048	0.0042	0.00453333
1:6515329	0.00626667	0.00473333	0.0044	0.00493333	0.00373333
1:6518228	0.00606666	0.00426667	0.00546667	0.0052	0.00326667
1:6521132	0.00653333	0.00393333	0.00513333	0.0048	0.00566667
1:6529503	0.00566667	0.00433333	0.00526667	0.00346667	0.00353333
1:6534487	0.00566667	0.0038	0.0052	0.00453333	0.00446667
1:6535229	0.0062	0.00546667	0.0054	0.0048	0.00466667
1:6535924	0.0048	0.0056	0.00493333	0.00393333	0.004
1:6536580	0.0052	0.00386667	0.00493333	0.00346667	0.005
1:6537434	0.00546667	0.005	0.00606667	0.00466667	0.00486667
1:6539650	0.0056	0.004	0.00553333	0.00433333	0.00426667
1:6540762	0.00593333	0.00466667	0.0056	0.00446666	0.00426667
1:6542647	0.0056	0.0044	0.00486667	0.00393333	0.00446667
1:6544525	0.00626667	0.00353333	0.00486667	0.00453333	0.00446667
1:6549465	0.00646667	0.0044	0.0044	0.00426667	0.0048
1:6554624	0.00653333	0.00513333	0.0042	0.00413333	0.00413333
1:6559834	0.00573333	0.0042	0.00566667	0.0044	0.0052
1:6563124	0.00606667	0.0044	0.00486667	0.00406667	0.00513333
1:6574237	0.00526667	0.00466667	0.005	0.00553333	0.00433333
1:6576378	0.00593333	0.00466667	0.0052	0.00553333	0.00406667
1:6577244	0.0062	0.00513333	0.00513333	0.00393333	0.0044
1:6578419	0.0056	0.0042	0.0056	0.00466667	0.00426667
1:6579099	0.00533333	0.00526667	0.00453333	0.00433334	0.0046
1:6580370	0.00573333	0.00426667	0.0048	0.00466667	0.0046
1:6581064	0.00586667	0.0044	0.00466667	0.0052	0.00393333
1:6581802	0.00533333	0.00506667	0.00486667	0.004	0.00453333
1:6584136	0.0056	0.00373333	0.00546667	0.0044	0.0046
1:6587222	0.00466667	0.0038	0.0048	0.00413334	0.00373333
1:6589074	0.00653333	0.0052	0.00513333	0.00513333	0.004
1:6594554	0.00633334	0.00466667	0.0048	0.0042	0.00433333
1:6597391	0.0058	0.0056	0.0044	0.00426667	0.00393333
1:6598700	0.00506667	0.00413333	0.00493333	0.00453333	0.0044
1:6600462	0.0058	0.0046	0.00553333	0.00393333	0.0028
1:6609259	0.00633334	0.0044	0.0056	0.00553333	0.00513333
1:6611199	0.006	0.00473333	0.00453333	0.00406667	0.004
1:6612693	0.00613333	0.0044	0.00533333	0.00486666	0.00453333
1:6613426	0.00586667	0.00386667	0.00560001	0.00613333	0.0054
1:6614786	0.00613333	0.0046	0.006	0.00533333	0.00453333
1:6615815	0.0056	0.00493333	0.005	0.00533333	0.00466667
1:6616868	0.00646667	0.00373333	0.00486667	0.00493333	0.00506667
1:6617974	0.0054	0.00413333	0.00633333	0.0042	0.00426667
1:6620157	0.00546667	0.004	0.00586667	0.00493333	0.0046
1:6621249	0.0054	0.00433333	0.0048	0.00393333	0.00313333
1:6624565	0.00666667	0.00406667	0.0054	0.00446667	0.00506667
1:6626317	0.00466667	0.00366667	0.00513333	0.00533333	0.004
1:6627314	0.00606667	0.00413333	0.0052	0.00426667	0.00446667
1:6628544	0.00653333	0.00433333	0.0046	0.0058	0.00513333
1:6629497	0.0058	0.00393333	0.0048	0.00413334	0.00386667
1:6630423	0.00533333	0.00493333	0.00486667	0.00466667	0.00473333
1:6632655	0.00593333	0.00493333	0.00453333	0.005	0.00353333
1:6633732	0.00646667	0.00453333	0.00473333	0.00426667	0.00466666
1:6635773	0.00593333	0.0036	0.00446667	0.00433333	0.00446667
1:6636547	0.00546667	0.00433333	0.00533333	0.00453333	0.00493333
1:6637430	0.00646667	0.00373333	0.00433333	0.0046	0.00546667
1:6638393	0.00706667	0.0046	0.0064	0.00426667	0.00466667
1:6643362	0.00526667	0.0042	0.0044	0.0042	0.0034
1:6656130	0.00753333	0.004	0.0044	0.0046	0.00333333
1:6659142	0.00566666	0.00506667	0.0052	0.005	0.0048
1:6660449	0.00493333	0.00533333	0.0056	0.00406667	0.00433333
1:6661283	0.00553333	0.0038	0.0046	0.0042	0.0046
1:6662238	0.00573333	0.00453333	0.00506667	0.0046	0.0056
1:6663728	0.00573333	0.00326667	0.0048	0.00413333	0.00513333
1:6672488	0.00553333	0.00393333	0.00506667	0.00513333	0.00466666
1:6675534	0.00586667	0.0044	0.0056	0.00533333	0.00426667
1:6684490	0.005	0.00493333	0.00493333	0.00446667	0.00466667
1:6687119	0.00586667	0.0048	0.00513333	0.00493333	0.005
1:6688520	0.00533333	0.00486667	0.0064	0.00406667	0.00546667
1:6695664	0.00693334	0.004	0.00633333	0.0048	0.00473333
1:6703365	0.00593333	0.00486667	0.00466667	0.0048	0.00493333
1:6708479	0.00666667	0.0034	0.00446667	0.00393333	0.00413334
1:6712326	0.00653333	0.00353333	0.00566667	0.0046	0.00473333
1:6716662	0.00573333	0.0046	0.00593333	0.00413333	0.00426667
1:6723846	0.00506667	0.00446667	0.00586667	0.00486667	0.0044
1:6729576	0.00506667	0.00373334	0.0058	0.00346667	0.00513333
1:6734261	0.00553333	0.0058	0.004	0.00373334	0.00466667
1:6739866	0.00586667	0.00446667	0.00526667	0.00506667	0.0048
1:6740664	0.00520001	0.00446667	0.00453333	0.00466667	0.00446667
1:6742502	0.0066	0.0044	0.00513333	0.00346667	0.00406667
1:6750601	0.00626667	0.00426667	0.0052	0.00426667	0.0042
1:6760842	0.00593333	0.00386667	0.0068	0.0038	0.00386667
1:6766995	0.00466667	0.00466667	0.00546667	0.00426667	0.00453333
1:6771750	0.0056	0.0044	0.0034	0.0042	0.00426667
1:6773377	0.00673333	0.00453333	0.00486667	0.00386667	0.0048
1:6777156	0.0062	0.00386667	0.0046	0.00406667	0.00433333
1:6786716	0.00606667	0.00526667	0.00546667	0.00393333	0.00453333
1:6790162	0.00566667	0.00453333	0.00613333	0.0048	0.00553333
1:6792812	0.00666667	0.00446667	0.00466667	0.005	0.0048
1:6794062	0.0066	0.0036	0.00433333	0.00473333	0.0056
1:6796330	0.00566666	0.00513333	0.005	0.0052	0.004
1:6800683	0.00553333	0.00446667	0.00493333	0.0044	0.0038
1:6804453	0.00693333	0.005	0.0048	0.00446667	0.0056
1:6807678	0.0062	0.00473333	0.0052	0.00413333	0.00466667
1:6812013	0.00619999	0.00413333	0.006	0.00406667	0.00433333
1:6813154	0.00566667	0.0044	0.00386667	0.00506667	0.00426666
1:6813575	0.00613333	0.00433333	0.00533333	0.0042	0.00473333
1:6816711	0.00606667	0.0044	0.006	0.00406667	0.004
1:6819097	0.0056	0.00393333	0.0054	0.00366667	0.00433333
1:6821923	0.006	0.0048	0.0054	0.00466667	0.00333333
1:6829041	0.00566667	0.00486666	0.0046	0.0056	0.0038
1:6830134	0.0052	0.0046	0.0056	0.00433333	0.0038
1:6831479	0.00546667	0.0052	0.00533333	0.00526667	0.00353333
1:6832482	0.00606667	0.0038	0.0044	0.0034	0.0048
1:6833523	0.0054	0.00473333	0.00586667	0.00453333	0.00426667
1:6835060	0.00566667	0.00413334	0.0058	0.0042	0.00466667
1:6839575	0.0058	0.00433333	0.005	0.00406667	0.0048
1:6843947	0.00466667	0.00473333	0.00426667	0.00493333	0.00366667
1:6844784	0.0058	0.0042	0.00526667	0.00366667	0.0038
1:6848895	0.0064	0.0038	0.00466666	0.00446667	0.00486667
1:6851945	0.00593333	0.00453333	0.00466667	0.00533333	0.00406667
1:6853058	0.006	0.00526667	0.0062	0.00433333	0.00493333
1:6857103	0.00653333	0.00486667	0.00486667	0.0048	0.00453333
1:6858810	0.0054	0.00553333	0.00586667	0.00386667	0.00493333
1:6861339	0.00666667	0.00406667	0.00493333	0.00346667	0.00393333
1:6864130	0.00526667	0.0038	0.00426666	0.0042	0.0042
1:6881831	0.00566667	0.00353333	0.00506667	0.00466667	0.00453333
1:6886818	0.00606667	0.00493333	0.00466667	0.00426667	0.00513333
1:6893254	0.0058	0.00406667	0.00533333	0.0046	0.0042
1:6896792	0.00693333	0.0044	0.00406667	0.00346667	0.0044
1:6899688	0.00646667	0.0038	0.00486667	0.005	0.00406667
1:6900017	0.00553333	0.00513333	0.0044	0.00506667	0.00386667
1:6903260	0.0052	0.004	0.00546666	0.0042	0.00506667
1:6907295	0.00493333	0.00413333	0.0054	0.00446667	0.0036
1:6910759	0.00626667	0.0058	0.00493333	0.00466667	0.00433333
1:6911486	0.006	0.0044	0.005	0.00373333	0.0052
1:6912722	0.0058	0.005	0.00486666	0.0044	0.0042
1:6913476	0.00493333	0.00353333	0.00513333	0.00526667	0.00533333
1:6916821	0.00473333	0.0036	0.00573333	0.0046	0.0042
1:6919995	0.00526667	0.0048	0.00626667	0.00466667	0.0048
1:6923025	0.00593333	0.0042	0.00506667	0.00553333	0.00433333
1:6924915	0.00633333	0.00546667	0.0042	0.00426667	0.0052
1:6925674	0.0058	0.00366667	0.00453333	0.00426667	0.00346667
1:6926591	0.00686666	0.00453333	0.00426667	0.0034	0.00506667
1:6929678	0.00466667	0.00466667	0.00493333	0.00393333	0.00433333
1:6933766	0.00553333	0.005	0.0058	0.00453333	0.0038
1:6937787	0.00473333	0.00386666	0.00446667	0.00486667	0.00433333
1:6943072	0.00546667	0.00526667	0.00506667	0.0046	0.00466667
1:6946810	0.0058	0.00466667	0.00453333	0.0042	0.005
1:6952436	0.00586667	0.00353333	0.00426667	0.00513333	0.00373333
1:6954311	0.00526667	0.00566667	0.00466667	0.00386667	0.00426667
1:6960474	0.0052	0.0036	0.00466667	0.00473333	0.00473333
1:6962953	0.00619999	0.0042	0.0046	0.00386667	0.0044
1:6963461	0.00719999	0.00393333	0.00506667	0.00486667	0.0042
1:6964418	0.00506667	0.0046	0.00553333	0.0052	0.0048
1:6965434	0.00586667	0.0052	0.0042	0.00433333	0.00573333
1:6972201	0.00673333	0.00366667	0.00606667	0.00546667	0.00413333
1:6973146	0.00666666	0.00486667	0.005	0.0038	0.0046
1:6975612	0.00526667	0.0046	0.00493334	0.0042	0.00453333
1:6982081	0.0052	0.00493333	0.00513334	0.00346667	0.00506667
1:6990464	0.00626667	0.0042	0.00433333	0.00446667	0.00466667
1:6993662	0.00653333	0.0036	0.0052	0.00473333	0.00406667
1:7002644	0.00620001	0.004	0.00566667	0.0052	0.0038
1:7006072	0.00653333	0.00566667	0.00553333	0.00486667	0.00573333
1:7013172	0.00659999	0.0036	0.00413333	0.00466667	0.0046
1:7019708	0.00573333	0.00466667	0.00433333	0.00446666	0.00393333
1:7020726	0.0058	0.0046	0.0052	0.0042	0.00426667
1:7022169	0.00626667	0.00413333	0.00573334	0.00366667	0.004
1:7024614	0.00653334	0.00446667	0.00486667	0.0042	0.00386667
1:7029810	0.00753333	0.0048	0.00486666	0.00373333	0.00373334
1:7030796	0.00653333	0.0048	0.00453333	0.006	0.00453333
1:7031577	0.00626667	0.0028	0.0056	0.0042	0.00486667
1:7032815	0.00660001	0.00353333	0.005	0.0054	0.00453333
1:7033988	0.00526667	0.00393333	0.00406667	0.00513333	0.00413333
1:7035600	0.005	0.00453333	0.0052	0.00433333	0.00346667
1:7036069	0.00759999	0.00433333	0.00546667	0.0036	0.0042
1:7036520	0.00593333	0.00413333	0.00426667	0.0048	0.004
1:7037229	0.00506666	0.00406667	0.006	0.00393333	0.0042
1:7037871	0.0064	0.00466667	0.00666667	0.0048	0.0044
1:7039964	0.00586667	0.00506667	0.005	0.004	0.00346667
1:7043010	0.00613333	0.00486667	0.00573333	0.0046	0.00373333
1:7045090	0.00473333	0.0032	0.00446667	0.00326667	0.0032
1:7045797	0.00553333	0.0052	0.0054	0.0044	0.0046
1:7046997	0.00746666	0.00493333	0.00553333	0.004	0.00433333
1:7047544	0.0058	0.005	0.0044	0.00486667	0.004
1:7048098	0.00466667	0.00466667	0.0064	0.00386667	0.0048
1:7049907	0.00486667	0.004	0.0044	0.00453333	0.00433333
1:7050494	0.00553333	0.0046	0.00633334	0.0042	0.00493333
1:7051010	0.00606667	0.0036	0.00406667	0.0046	0.00426667
1:7051526	0.00646667	0.00493333	0.00393333	0.00433333	0.00406667
1:7054247	0.0054	0.00446667	0.00473333	0.00493333	0.00373333
1:7057363	0.00586667	0.0048	0.00526667	0.00453333	0.00353333
1:7059775	0.00473333	0.00446667	0.00506667	0.00453333	0.00493333
1:7064962	0.0058	0.00406667	0.00433333	0.00473333	0.00433333
1:7071121	0.005	0.00473333	0.00506667	0.0048	0.0034
1:7074213	0.0074	0.0046	0.00426667	0.00426667	0.0046
1:7075159	0.0056	0.0062	0.00486667	0.00426667	0.00393333
1:7081201	0.00566667	0.00546667	0.00526667	0.00353333	0.0048
1:7089354	0.00653333	0.00606667	0.0052	0.0036	0.00473333
1:7092513	0.00593333	0.0042	0.00486667	0.0052	0.00453333
1:7096806	0.0056	0.00533333	0.0052	0.00406667	0.0048
1:7102858	0.00619999	0.005	0.00466667	0.005	0.0048
1:7104072	0.0058	0.005	0.00586667	0.00466667	0.00373333
1:7108873	0.006	0.00546667	0.005	0.00446667	0.00426667
1:7110149	0.00686666	0.00373333	0.005	0.00453333	0.00453333
1:7110979	0.0056	0.00466667	0.006	0.00493334	0.00386667
1:7112791	0.00586667	0.0042	0.00586667	0.00426667	0.0044
1:7114057	0.0064	0.0044	0.00553333	0.005	0.00446667
1:7118368	0.00586667	0.00413333	0.00506667	0.00453333	0.00413334
1:7122553	0.00566667	0.00346667	0.00473333	0.00393333	0.00433333
1:7126496	0.00506667	0.0038	0.00446667	0.00393333	0.0046
1:7128382	0.00573333	0.00366667	0.0044	0.00486667	0.0048
1:7129981	0.0066	0.005	0.005	0.0048	0.00426667
1:7131192	0.006	0.00406667	0.0048	0.00366667	0.0048
1:7133267	0.00606667	0.0044	0.00573333	0.00373333	0.00426667
1:7140544	0.00606667	0.00386667	0.00533333	0.00453333	0.00426667
1:7144946	0.00606667	0.00433333	0.00526667	0.0042	0.00373333
1:7160436	0.00606667	0.00533333	0.00546667	0.00453333	0.00386667
1:7162364	0.00639999	0.00546667	0.00473333	0.00493333	0.0042
1:7164618	0.00606667	0.0044	0.0046	0.00473333	0.00426667
1:7167761	0.00646667	0.0036	0.00533333	0.0042	0.00506667
1:7168764	0.0054	0.00446667	0.00526667	0.00353333	0.0048
1:7169869	0.00613333	0.00466667	0.00493333	0.00466667	0.00506667
1:7173548	0.0068	0.00413333	0.00466667	0.0036	0.0048
1:7181917	0.00613333	0.00353333	0.0062	0.00373333	0.0036
1:7186242	0.00546667	0.005	0.0048	0.00486666	0.00406667
1:7187442	0.00466667	0.0046	0.00413333	0.00546667	0.00393333
1:7187997	0.00593333	0.00346667	0.00466667	0.00526667	0.00506667
1:7191441	0.0062	0.00433333	0.00526666	0.0058	0.00413333
1:7194216	0.0068	0.0042	0.00506667	0.0046	0.0048
1:7195207	0.0064	0.0034	0.0036	0.00473333	0.00486667
1:7196708	0.00593333	0.00533333	0.0046	0.00413333	0.0036
1:7198657	0.00593333	0.00413333	0.0062	0.00486667	0.00486667
1:7203162	0.00573333	0.0056	0.00580001	0.00426667	0.00373333
1:7208722	0.00553333	0.00473333	0.00513333	0.004	0.00493333
1:7211257	0.00806666	0.00366667	0.0046	0.00446667	0.0046
1:7216900	0.0066	0.00386667	0.00533333	0.00433333	0.0048
1:7219518	0.0062	0.005	0.00546667	0.00386667	0.0048
1:7224160	0.0064	0.00406667	0.0046	0.00453333	0.00486667
1:7230393	0.0068	0.0038	0.00493333	0.00406667	0.00406667
1:7232562	0.00666666	0.00513333	0.00453333	0.00393333	0.00473333
1:7233922	0.00626666	0.00553334	0.00473333	0.0034	0.00386667
1:7234623	0.00606667	0.0046	0.00493334	0.00533333	0.00406667
1:7236157	0.0056	0.00533333	0.005	0.004	0.005
1:7240916	0.00606667	0.00453333	0.00566667	0.00553333	0.00373333
1:7244539	0.00513334	0.00406667	0.0052	0.005	0.00413333
1:7248213	0.00653333	0.00486666	0.0042	0.00406667	0.005
1:7249266	0.00606667	0.00546667	0.00446667	0.00406667	0.00513333
1:7250045	0.00546667	0.00413333	0.00486667	0.00453333	0.00473333
1:7252986	0.00553333	0.0044	0.00526667	0.0046	0.0044
1:7256139	0.00646667	0.00433333	0.0052	0.00513333	0.00453333
1:7259443	0.00653333	0.0046	0.0054	0.0048	0.00466667
1:7260253	0.00626666	0.00453333	0.00486667	0.00506667	0.00466667
1:7264481	0.0066	0.004	0.00333333	0.00446667	0.0054
1:7269335	0.00553333	0.00453333	0.00573333	0.00426667	0.00426667
1:7271760	0.00586667	0.00466667	0.0042	0.00353333	0.00446667
1:7289247	0.00566667	0.00393333	0.00466667	0.00406667	0.00466667
1:7293292	0.0058	0.00473333	0.0052	0.00406667	0.00426667
1:7296361	0.0058	0.005	0.00466667	0.00433333	0.00453333
1:7297878	0.00586667	0.00433333	0.00506667	0.00446667	0.0048
1:7304017	0.00566667	0.00493333	0.00646667	0.0036	0.00486667
1:7306412	0.00586667	0.0042	0.00473333	0.0032	0.00473333
1:7307507	0.0062	0.00373333	0.00433333	0.0046	0.00506667
1:7315197	0.0056	0.00393333	0.00493333	0.00426667	0.0042
1:7318859	0.0066	0.0036	0.00546667	0.00353333	0.00546667
1:7321829	0.00633333	0.00426667	0.0046	0.005	0.0042
1:7325749	0.00513333	0.00506667	0.0052	0.0048	0.00433333
1:7333147	0.005	0.00566667	0.00446667	0.00433333	0.00433333
1:7337336	0.00526667	0.00393333	0.00553333	0.00573333	0.0046
1:7342138	0.00566667	0.00406667	0.00533333	0.00293333	0.00453333
1:7347355	0.00653333	0.00466667	0.00446667	0.00466667	0.0048
1:7354808	0.005	0.00413333	0.00493333	0.00393333	0.00413333
1:7358936	0.0056	0.00413333	0.00493333	0.0042	0.00393333
1:7366650	0.00486667	0.00473333	0.004	0.00406667	0.0036
1:7371369	0.0058	0.0038	0.0042	0.00526667	0.00486667
1:7374326	0.00466667	0.00486667	0.00553333	0.0052	0.00353333
[truncated: 707,770+ more rows]
